# 1 **The molecular clock of *Mycobacterium tuberculosis***

2 F. Menardo<sup>1,2\*</sup>, S. Duchêne<sup>3</sup>, D. Brites<sup>1,2</sup> and S. Gagneux<sup>1,2</sup>

3

4 <sup>1</sup> Department of Medical Parasitology and Infection Biology, Swiss Tropical and Public Health

5 Institute, 4002 Basel, Switzerland

6 <sup>2</sup> University of Basel, 4003 Basel, Switzerland

7 <sup>3</sup> Department of Microbiology and Immunology, Peter Doherty Institute for Infection and Immunity,

8 University of Melbourne, 3010, Melbourne, Australia

9 \* Correspondence: [fabrizio.menardo@swisstph.ch](mailto:fabrizio.menardo@swisstph.ch)

10

11

12

13

14

15

16

17

## 18 **Abstract**

19 The molecular clock and its phylogenetic applications to genomic data have changed how we study and  
20 understand one of the major human pathogens, *Mycobacterium tuberculosis* (MTB), the causal agent of  
21 tuberculosis. Genome sequences of MTB strains sampled at different times are increasingly used to  
22 infer when a particular outbreak began, when a drug resistant clone appeared and expanded, or when a  
23 strain was introduced into a specific region. Despite the growing importance of the molecular clock in  
24 tuberculosis research, there is a lack of consensus as to whether MTB displays a clocklike behavior and  
25 about its rate of evolution. Here we performed a systematic study of the molecular clock of MTB on a  
26 large genomic data set (6,285 strains), covering different epidemiological settings and most of the  
27 known global diversity. We found that sampling times below 15-20 years were often insufficient to  
28 calibrate the clock of MTB. For data sets where such calibration was possible we obtained a clock rate  
29 between  $1 \times 10^{-8}$  and  $5 \times 10^{-7}$  nucleotide changes per-site-per-year (0.04 - 2.2 SNPs per-genome-per-  
30 year), with substantial differences between clades. These estimates were not strongly dependent on the  
31 time of the calibration points as they changed only marginally when we used epidemiological isolates  
32 (sampled in the last 40 years) or ancient DNA samples (about 1,000 years old) to calibrate the tree.  
33 Additionally, the uncertainty and the discrepancies in the results of different methods were sometimes  
34 large, highlighting the importance of using different methods, and of considering carefully their  
35 assumptions and limitations.

36

## 37 **Keywords**

38 Evolution, Phylogenetics, Pathogen, Bacteria, Molecular clock, Tuberculosis.

39

## 40 **Introduction**

41 In 1962, Zuckerman and Pauling used the number of amino-acid differences among hemoglobin  
42 sequences to infer the divergence time between human and gorilla, in what was the first application of  
43 the molecular clock (Zuckerman and Pauling 1962). Although many at the time found it “crazy”  
44 (Morgan 1998), soon the molecular clock was incorporated in Kimura’s neutral theory of molecular  
45 evolution (Kimura 1968), and found its place in the foundations of evolutionary biology. Thanks to the  
46 improvements of sequencing technologies and statistical techniques, it is now possible to use sequences  
47 sampled at different times to calibrate the molecular clock and study the temporal dimension of  
48 evolutionary processes in so called measurably evolving populations (Drummond et al. 2003). These  
49 advancements have been most relevant for ancient DNA (aDNA), and to study the evolutionary  
50 dynamics of pathogen populations, including one of the deadliest human pathogens: *Mycobacterium*  
51 *tuberculosis* (WHO 2018).

52 In 1994, Kapur and colleagues pioneered molecular clock analyses in MTB: they assumed a clock rate  
53 derived from other bacteria and used genetic polymorphisms to infer the age of divergence of different  
54 MTB strains (Kapur et al. 1994). Since then, phylogenetic analyses with a molecular clock have been  
55 used to estimate the timing of the introduction of MTB clades to particular geographic regions, the  
56 divergence time of the MTB lineages, and the age of the most recent common ancestor (MRCA) of the  
57 MTB complex (Comas et al. 2013, Bos et al. 2014, Merker et al. 2015, Kay et al. 2015, Brynildsrud et  
58 al. 2018, Liu et al. 2018, Rutaihwa et al. 2019). Clock models, together with phylodynamic models in a  
59 Bayesian setting have been used to characterize tuberculosis epidemics by determining the time at  
60 which outbreaks began and ended (Eldholm et al. 2015, Lee et al. 2015, Folkvardsen et al. 2017,  
61 Bainomugisa et al. 2018, Kühnert et al. 2018), establishing the time of origin and spread of drug  
62 resistant clades (Cohen et al. 2015, Eldholm et al. 2015, Eldholm et al. 2016, Brynildsrud et al. 2018),

63 and correlating population dynamics with historical events (Pepperell et al. 2013, Merker et al. 2015,  
64 Eldholm et al. 2016, Liu et al. 2018, Merker et al. 2018). One example of the potential of molecular  
65 clock analyses is the study of Eldholm and colleagues (Eldholm et al. 2016), where the collapse of the  
66 Soviet Union and of its health system was linked to the increased emergence of drug resistant strains in  
67 former Soviet countries, thus providing insights into the evolutionary processes promoting drug  
68 resistance.

69 A key aspect about estimating evolutionary rates and timescales in microbial pathogens is assessing  
70 their clocklike structure. All molecular clock analyses require some form of calibration. In many  
71 organisms this consists in constraining internal nodes of phylogenetic trees to known divergence times  
72 (for example, assuming codivergence with the host, or the fossil record), but in rapidly evolving  
73 pathogens and studies involving aDNA, it is also possible to use sampling times for calibrations (Seo et  
74 al. 2002). In the latter approach, the ages of tips of the tree, rather than those of internal nodes are  
75 constrained to their collection times. Clearly, the sampling time should capture a sufficient number of  
76 nucleotides changes to estimate the evolutionary rate, which will depend on the evolutionary rate of the  
77 organism and the extent of rate variation among lineages. Some popular methods to assess such  
78 clocklike structure are the root-to-tip regression and the date randomization test (DRT).

79 While many of the studies inferring evolutionary rates for MTB reported support for a molecular clock  
80 (Eldholm et al. 2015, Kay et al. 2015, Eldholm et al. 2016, Folkvardsen et al. 2017, Brynildsrud et al.  
81 2018, Kühnert et al. 2018, Merker et al. 2018, Rutaihwa et al. 2019), some found a lack of clocklike  
82 structure (Comas et al. 2013, Bainomugisa 2018, Kühnert et al. 2018), and others assumed a molecular  
83 clock without testing whether the data had a temporal structure (Pepperell et al. 2013, Cohen et al.  
84 2015, Merker et al. 2015, Lee et al. 2015, Liu et al. 2018). In all studies where the calibration was  
85 based on the sampling time (tip-dating), the clock rate estimates spanned roughly an order of  
86 magnitude around  $10^{-7}$  nucleotide changes per site per year. This was in contrast with the results of

87 Comas et al. 2013, where the clock was calibrated assuming co-divergence between MTB lineages and  
88 human mitochondrial haplotypes (i.e. internal node calibrations), and was estimated to be around  $10^{-9}$   
89 nucleotide changes per site years. Some lineage 2 (L2) data sets (Eldholm et al. 2016) were found to  
90 have a faster clock rate compared to lineage 4 (L4) data sets (Pepperell et al. 2013, Eldholm et al.  
91 2015, Folkvardsen et al. 2017, Brynildsrud et al. 2018 ), while others showed lower clock rates,  
92 comparable with L4 (Merker et al. 2018, Rutaihwā et al. 2019 ). Studies based on aDNA produced  
93 slightly lower clock rate estimates (Bos et al. 2014, Kay et al. 2015, Sabin et al. unpublished  
94 <https://www.biorxiv.org/content/10.1101/588277v1>) compared to studies based on modern strains, thus  
95 suggesting support for the phenomenon of time dependency of clock rates in MTB (Ho et al. 2011). All  
96 these results indicate that different MTB lineages and populations might have different clock rates, and  
97 that the age of the calibration points could influence the results of the analyses. Comparing the results  
98 of different studies has however a main limitation: the observed differences could be due to different  
99 rates of molecular evolution among MTB populations, to methodological discrepancies among studies,  
100 or a combination of both.

101 Here, we assembled a large genomic data set including sequences from all major lineages of MTB  
102 (6,285 strains in total, belonging to six human adapted lineages, L1-L6, and one lineage predominantly  
103 infecting cattle, *M. bovis*). We then applied the same set of methodologies to the whole data set, to  
104 individual lineages and sub-lineages, and to selected local outbreaks, thus ensuring the comparability of  
105 the results among different clades and epidemiological settings.

106 With this systematic approach, we addressed the following questions:

107 1) Is there a molecular clock in MTB and how do we detect it?

108 2) What is the clock rate of MTB, and what is its variation among lineages, sub-lineages and individual  
109 outbreaks?

110 3) Are clock rate estimates dependent on the age of the calibration points in MTB?

111

## 112 **Results and Discussion**

### 113 **Is there a molecular clock in MTB?**

114 Finding evidence of temporal structure is the first step when performing molecular clock analyses  
115 (Rieux and Balloux 2016). If there is not enough genetic variation between samples collected at  
116 different times, these cannot be used to calibrate the molecular clock, i.e. the population is not  
117 measurably evolving. To test the temporal structure of MTB data sets we identified 6,285 strains with a  
118 good quality genome sequence, and for which the date of isolation was known (Methods, Sup. Table  
119 S1).

120 We used root to tip regression to evaluate the temporal structure of the whole MTB complex and of the  
121 individual lineages (L1-L6 and *M. bovis*) (Rambaut et al. 2016). The root to tip regression is a  
122 regression of the root-to-tip distances as a function of sampling times of phylogenetic trees with branch  
123 lengths in units of nucleotide changes per site, where the slope corresponds to the rate. Under a perfect  
124 clock-like behavior, the distance between the root of the phylogenetic tree and the tips is a linear  
125 function of the tip's sampling year: recently sampled strains are further away from the root than older  
126 ones, such that the  $R^2$  is the degree of clocklike behavior (Korber et al. 2000). We obtained very low  
127 values of  $R^2$  for all lineages (maximum 0.1 for *M. bovis*), indicating a lack of strong clock-like behavior  
128 (Sup. Fig. S2). Additionally, we found a weak negative slope for L1, L5 and L6, normally interpreted  
129 as evidence for a lack of temporal structure, or overdispersion in the lineage-specific clock rates  
130 (Rambaut et al. 2016, Sup. Fig. S2, Sup. Table S3). Negative slope of the regression line can be caused  
131 by an incorrect placement of the root (Tong et al.2018). To address this potential problem, we repeated

132 these analyses rooting the trees with an outgroup, we found a negative slope for L1 and L6 and a  
133 positive slope for L5, although with an extremely low value of  $R^2$  ( $< 0.01$ ). These results indicate that  
134 the negative slope of L1 and L6 and the low  $R^2$  values of the three data sets are not due to an incorrect  
135 placement of the root (Sup. Fig. S4).

136 Since root to tip regression can be used only for exploratory analyses and not for formal hypothesis  
137 testing (Rambaut et al. 2016), we performed a date randomization test (DRT). The DRT consists in  
138 repeatedly reshuffling the date of sampling among taxa and then comparing the clock rate estimates  
139 among the observed and reshuffled data sets (Rieux and Balloux 2016). If the estimation obtained from  
140 the observed data does not overlap with the estimations obtained from the randomized data sets, we can  
141 conclude that the observed data has a stronger temporal signal than expected by chance, such that there  
142 is statistically significant clocklike structure (Rieux and Balloux 2016). Usually the DRT is  
143 implemented in a Bayesian phylogenetic setting, however, considering the size and the number of data  
144 sets included in this study, an excessive amount of computation would be required. To overcome this  
145 problem, we estimated the clock rate with the least-squared dating method implemented in LSD (To et  
146 al. 2015). The advantage of this method is that it is orders of magnitude faster than fully Bayesian  
147 approaches, and can therefore be used on data sets with thousands of taxa and with more  
148 randomizations compared to the 10-20 typically used in a Bayesian setting (Duchene et al. 2018). A  
149 limitation of least squares dating is that it typically assumes a single tree topology and vector of branch  
150 lengths, and a strict clock (i.e. all branches have the same clock rate). However, a simulation study  
151 showed that maximum likelihood trees produced similar estimates compared to the true topology, and  
152 that it is robust to uncorrelated variation of the clock rate among branches in the phylogeny (To et al.  
153 2015, Duchene et al. 2016 a, Duchene et al. 2018).

154 For each data set, we reshuffled the year of sampling among tips 100 times and estimated the clock rate  
155 of observed and randomized data sets with LSD. All eight data sets except L5 and L6 passed the DRT

156 (Methods, Sup. Fig. S2, Sup. Table S3). L5 and L6 are the two lineages with the lowest sample size,  
157 117 and 33 strains, respectively. Moreover most strains were sampled in a short temporal period  
158 compared to the other lineages (Sup. Figs. S5-S10). It is likely that with additional strains sampled  
159 across a larger time period, L5 and L6 will also show evidence for a molecular clock.

160 We complemented the analysis described above with a Bayesian phylogenetic analysis in Beast2  
161 (Bouckaert et al. 2014). Since this is computationally expensive, we reduced the large data sets  
162 (MTBC, L1, L2, L4 and *M. bovis*) to 300 randomly selected strains. For each data set we selected the  
163 best fitting nucleotide substitution model identified with jModelTest 2 (Darriba et al. 2012). For this  
164 first analysis, we assumed a coalescent constant population size prior, used a relaxed clock model, and  
165 a  $1/x$  prior for the clock rate, constrained between  $10^{-10}$  and  $10^{-5}$  nucleotide changes per site per year.  
166 This interval spans the range of clock rates proposed for *M. tuberculosis* and for most other bacteria  
167 (Duchene et al 2016 b, Eldholm et al. 2016). We observed that for all data sets the posterior was much  
168 more precise (with a narrow distribution) than the prior, thus indicating that the data was informative  
169 (Drummond et al. 2006). Again, the only exceptions were L5 and L6, where the posterior distribution  
170 was flat, ranging between  $10^{-10}$  and  $10^{-7}$  nucleotide changes per site per year, confirming the lack  
171 temporal structure of these two data sets (Sup. Fig. S2).

172 We repeated these analyses on 23 sub-lineages and 7 outbreaks and local populations to test whether  
173 we could detect a temporal structure also in smaller, less diverse data sets. With this sub-sampling  
174 scheme, we could compare the results among different clades, among outbreaks with different  
175 epidemiological characteristics, and among local outbreaks and global data-sets (see Methods). We  
176 found that 11 sub-lineages and 5 local populations passed the DRT (Sup. Table S3, Sup. Figs. S5-S8  
177 and S11-S13).



178 All the data sets that failed the DRT had less than 350 genomes, or were composed of strains sampled  
179 in a temporal range of 20 years or less. Additionally, only two of the ten data sets sampled across less  
180 than 15 years, and three of the twelve data sets with less than 100 strains passed the DRT (Fig. 1; Sup.  
181 Table S2), indicating that large sample sizes and wide temporal sampling windows appear to be  
182 necessary to obtain reliable estimates of evolutionary rates and timescales in MTB. Conversely, the  
183 number of polymorphic positions and the genetic diversity measured with Watterson's estimator did not  
184 correlate with the outcome of the DRT (Sup. Fig S14).

185 Among the three methods generally used to study the temporal structure of a data set, the root to tip  
186 regression resulted in a negative slope, and therefore failed to detect the temporal structure of some of  
187 the data sets that passed the DRT (i.e. L1, L4.1.2 and L1.1.1). Nevertheless, root to tip regression can  
188 be useful to identify data sets where the temporal signal comes from a single strain, or a few strains  
189 (see below). Comparing prior and posterior distributions of the clock rates was also useful to detect the  
190 presence of temporal structure, although this was not always in agreement with the results of the DRT:  
191 some of the data sets that did not pass the DRT (e.g. L2.2.1\_nc2, Trewby 2016) had a posterior  
192 distribution of the clock rate more distinct from the prior than some of the data set that passed the DRT  
193 (e.g. L1.1.1, L1.2.1 and L1.2.2) (Sup. Figs. S5 and S7-S8, Sup. Table S3). A possible reason for this  
194 could be that LSD and Beast have different statistical power with different data sets. Additionally, in  
195 some cases the deviation of the posterior distribution of the clock rate from the prior could be an  
196 artifact caused by tree prior misspecification, and not the result of genuine temporal structure (Möller et  
197 al. 2018).

198

199

200

## 201 **Sensitivity of the clock rate estimates to the model assumptions**

202 In Bayesian analyses, different models and priors are based on different assumptions about the  
203 evolutionary processes, and can thus influence the results (Bromham et al. 2018). Often different sets  
204 of assumptions are tested in a Bayesian framework by comparing their marginal posterior probability  
205 with the Bayes factor, and the most likely model is then chosen to estimate the parameters of interest  
206 (Bromham et al. 2018). Given the size and number of the data sets considered in this study, it is not  
207 possible to assess the relative fit of many competing models for all data sets. However, model  
208 misspecification can result in biased estimates. It is therefore important to investigate the robustness of  
209 the results to different models and priors.

210 We repeated the Bayesian analysis using a uniform prior instead of the  $1/x$  prior on the clock rate. We  
211 ran a Beast analysis sampling from the priors and found that the uniform prior was biased towards high  
212 clock rates and put most weight on rates between  $10^{-6}$  and  $10^{-5}$  nucleotide changes per site per year  
213 (Sup. Fig. S15). For all data sets, we compared the posterior distribution of the clock rate obtained with  
214 the two different priors (Sup. Figs. S16-S18, Sup. Table S3).

215 Some data sets showed hardly any difference (e.g. MTBC, L1, L2, L3, L4 etc.), indicating that the data  
216 was informative and that the data set had a strong temporal structure. However, this did not always  
217 correlate with the results of the DRT. For example, the subset of 300 strains of L2 and the data set  
218 Trewby 2016 did not pass the DRT but showed a distinct posterior distribution that was not sensitive to  
219 the prior choice. Other data sets, including three that passed the DRT by a small margin (L1.1.1, L1.2.1  
220 and L1.2.2), were more sensitive to the prior choice and resulted in two distinct posterior distributions,  
221 indicating a weaker temporal structure (Sup. Fig. S8).

222 An additional assumption of the phylogenetic model that can influence the results of molecular clock  
223 analyses is the tree prior (also known as demographic model). We tested the sensitivity to the tree prior

224 by repeating the analysis with an exponential population growth (or shrinkage) prior instead of the  
225 constant population size. For this analysis, we used the  $1/x$  prior on the clock rate and we considered  
226 only the data sets that passed the DRT (21 data sets). The constant population model is a specific case  
227 of the exponential growth model (when the growth rate is equal to zero). Therefore, if the 95% Highest  
228 Posterior Density interval (HPD) of the growth rate does not include zero, we can conclude that the  
229 data reject a demographic model with constant population size. We found that 14 data sets rejected the  
230 constant population size model, and that all of them had positive growth rates (Sup. Table S3). The  
231 three data sets that were found to be sensitive to the prior on the clock rate were also sensitive to the  
232 tree prior, confirming their low temporal structure and information content, while the results for all  
233 other data sets were only moderately influenced by the tree prior (Sup. Figs. 19-20, Sup. Table S3).

234 Overall, we found that, except for three data sets (L1.1.1, L1.2.1 and L1.2.2), the clock rate estimates  
235 were robust to different priors of the clock rate and to different demographic models. To compare the  
236 clock rates of different data sets, we report the analysis with the  $1/x$  prior on the clock rate because the  
237 uniform prior can bias the estimates upward. For data sets that showed evidence against the constant  
238 population size model (95% HPD of the growth rate not including zero), we report the results of the  
239 analysis with the exponential population growth, and for the others, we report the results of the analysis  
240 with constant population size.

241

## 242 **What is the clock rate of MTB, and what is its variation among lineages, sub-** 243 **lineages and outbreaks?**

244 We found that the point estimates of all data sets where we detected temporal structure range between  
245  $2.86 \times 10^{-8}$  (L3 Beast) and  $4.82 \times 10^{-7}$  (Eldholm 2016 Beast) nucleotide changes per site per year. While  
246 some data sets had a low range of the 95% confidence interval (CI), reaching the hard limit imposed by

247 LSD of  $10^{-10}$ , most of the CI and 95% highest posterior density intervals (HPD) are included between  
248  $10^{-8}$  and  $5 \times 10^{-7}$  (Fig. 2 and Sup. Table S3). This range encompasses previous estimates obtained with  
249 epidemiological samples and aDNA and is among the lowest in bacteria, thus supporting our  
250 conclusion from above: tip-dating with MTB requires samples collected over a long period of time  
251 because of the slow clock rate.

252 There was one notable exceptions to the pattern described above: the data sets L4\_nc which showed a  
253 much higher clock rate estimate compared to all other data sets included in this study ( $\sim 10^{-6}$ ; Sup. Table  
254 S3). However, this is most likely an artifact: 1) L4\_nc is the smallest among all considered data sets,  
255 with 32 strains. 2) Most strains are identical or nearly so, collected in the same year, and form a  
256 monophyletic clade (Sup. Figs. S9 and S21). It is known that data sets with a high degree of temporal  
257 and phylogenetic clustering can pass the DRT also when they do not have temporal structure (Duchene  
258 et al. 2015). 3) The root to tip regression suggests that the temporal signal comes from one single strain  
259 in L4\_nc (Sup. Fig. S7). We therefore excluded the L4\_nc data set from further analyses.

260 Our results suggest that different lineages of MTB have different clock rates, for example most L1 data  
261 sets had point estimates higher than most L4 data sets, although the CI and HPD were often  
262 overlapping. The point estimates indicate that the clock rate of L1 is more than double the clock rate of  
263 L4: two average L1 strains are expected to differ by 12 SNPs after ten years of divergence, while two  
264 average L4 strains will differ by 5 SNPs after the same period of time. This was supported by the  
265 results of both LSD, where the 95% CI of L1 and L4 did not overlap, and Beast, where the 95% HPD  
266 overlapped partially, but the two posterior distributions showed distinct peaks (Fig. 2, Sup Table S3,  
267 Sup. Fig. S22). A practical implication of these results pertains to the widespread use of SNP distances  
268 to identify ongoing transmission in MTB epidemiological studies. Usually, recent transmission is  
269 postulated when two or more strains differ by a number of SNPs below a certain threshold (Hatherell et  
270 al. 2016). However this approach will result in systematically lower levels of transmission for clades

271 with faster rates of molecular evolution. For example, a recent study reported low transmission rates of  
272 L1 compared to L2 and L4 in Vietnam (Holt et al. 2018), which could partially be explained by a faster  
273 clock rate of L1, opposed to reduced ongoing transmission.

274 When considering the results of Beast, also L2 had a higher clock rate compared to L4, and all data sets  
275 included in the sub-lineage L2.2.1 showed a faster clock rate compared to the complete L2 data set  
276 (Fig. 2). The sub-lineage L2.2.1 includes the so called “modern Beijing” family, which was shown to  
277 be epidemiologically associated with increased transmission, virulence and drug resistance (Glynn et  
278 al. 2006, Hanekom et al. 2010, de Steenwinkel et al. 2012, Ribeiro et al. 2014, Holt et al. 2018, Wiens  
279 et al. 2018), and to have a higher mutation rate compared to L4 strains (Ford et al. 2013). However, the  
280 LSD estimates for L2.2.1 and for its sub-lineages, despite showing the same trend of Beast, support a  
281 lower clock rate compared to Beast, and have large confidence intervals, overlapping with the results of  
282 L2 and L4 (Fig. 2).

283 Further evidence of among-lineage variation is provided by the results of the Bayesian analyses, where  
284 for most data sets we obtained coefficients of variation (COV) with a median of 0.2 – 0.3, and not  
285 abutting zero (Sup. Table S3), thus rejecting the strict clock (Drummond et al. 2006).

286 Taken together, these results indicate that there is a moderate variability among the current rate of  
287 molecular evolution of different MTB lineages, which could be caused by different mutation rates as it  
288 was reported for L2 and L4 (Ford et al. 2013), and support the idea that the inference of transmission in  
289 MTB should move from the use of SNP distances to methods that incorporate information about the  
290 molecular clock (Stimson et al. 2019).

291 In our analysis we included two outbreaks caused by strains belonging to the same sub-lineage (L4.1.2;  
292 Eldholm et al. 2015, Lee et al. 2015). This gives us the opportunity to compare the molecular clock of  
293 clades with a similar genetic background in different epidemiological settings. The Eldholm 2015 data

294 set is a sample of an outbreak in Argentina, in which resistance to multiple antibiotics evolved several  
295 times independently (Eldholm et al. 2015). The Lee 2015 data set represents an outbreak of drug  
296 susceptible strains in Inuit villages in Québec (Canada). The clock rates of these two data sets were  
297 highly similar (95% CI and HPD ranging between  $5.07 \times 10^{-8}$  and  $8.88 \times 10^{-8}$  for all analyses; Fig. 2, Sup.  
298 Table S3) thus suggesting that, at least in this case, different epidemiological characteristics, including  
299 the evolution of antibiotic resistance, do not have a large impact on the rate of molecular evolution of  
300 MTB.

301

### 302 **A faster clock for the ancestor of *M. bovis*?**

303 We showed that current clock rates are moderately different among different data sets. A different  
304 question is whether the clock rate was constant during the evolutionary history of the MTB complex.  
305 When looking at the phylogenetic tree of the MTB complex, rooted with the genome sequence of *M.*  
306 *canettii*, one notices that strains belonging to different lineages, despite being all sampled in the last 40  
307 years, have different distances from the root (Fig. 3). For example, since their divergence from the  
308 MRCA of the MTB complex, the two *M. africanum* lineages (L5 and L6) and especially *M. bovis*,  
309 accumulated more nucleotide changes than the lineages belonging to MTB sensu stricto (L1-L4; Fig.  
310 3). Additionally, all methods (root to tip regression, LSD and Beast) if used without an outgroup,  
311 placed the root on the branch between *M. bovis* and all other lineages, while rooting the tree with the  
312 outgroup *M. canettii* placed the root on the branch connecting MTB sensu stricto with *M. africanum*  
313 (L5 and L6) and *M. bovis*. The different root placement affects the clock rate estimation only  
314 moderately ( $4.16 \times 10^{-8}$  LSD analysis without outgroup,  $5.59 \times 10^{-8}$  LSD analysis with outgroup, Sup.  
315 Table S3), but it is a further indication of the variation of the rate of molecular evolution during the  
316 evolutionary history of the MTB complex. The observation that all *M. bovis* strains, despite having a

317 clock rate similar to all other data sets, have a larger distance from the root of the MTB complex tree  
318 compared to other lineages is intriguing, and could be explained by a faster rate of molecular evolution  
319 of the ancestors of *M. bovis* (Figs. 2-3). It is believed that *M. bovis* switched host (from human to  
320 cattle) (Brosh et al. 2002, Mostowy et al. 2002, Brites et al. 2018), and it is possible that during the  
321 adaptation to the new host several genes were under positive selection, thus leading to an increase in  
322 the accumulation of substitutions in the *M. bovis* genome. Another possibility is that the ancestor of *M.*  
323 *bovis* experienced a period of reduced population size, a bottleneck, and as a consequence, slightly  
324 deleterious mutations were fixed by genetic drift, resulting in a faster clock rate compared to larger  
325 populations where selection is more efficient in purging deleterious mutations (Ohta 1987, Bromham  
326 and Penny 2003).

327

## 328 **Time dependency of the clock rate**

329 It has been suggested that in MTB, as in other organisms, the clock rate estimation is dependent on the  
330 age of the calibration points (Ho et al. 2005, Ho et al. 2011, Comas et al. 2013, Duchene et al. 2014,  
331 Duchene et al. 2016 b), and that using recent population-based samples could result in an  
332 overestimation of the clock rate, because these samples include deleterious mutations that have not yet  
333 been purged by purifying selection. However, the validity of the time dependency hypothesis has been  
334 contested in general (Emerson and Hickerson 2015), and for MTB in particular (Pepperell et al. 2013).  
335 Here we used an approach similar to Rieux et al. (2014) and tested whether the time dependency  
336 hypothesis was supported by our data. We repeated the analyses presented above, only this time we  
337 included the aDNA genome sequences of three MTB strains obtained from Precolumbian human  
338 remains from Peru (Bos et al. 2014). If the clock rate estimates depend on the age of the calibration  
339 points, adding ancient genomes should result in lower clock rates. We performed this analysis with

340 LSD, using the complete data set (6,285 strains), and with Beast, using the sub-sample of 300 randomly  
341 selected strains described above, and an additional independent random sub-sample of 500 strains  
342 (Methods).

343 With LSD, adding the aDNA samples resulted in a slightly faster clock rate, conversely all the analyses  
344 performed with Beast resulted in marginally slower clock rates when the aDNA samples were included  
345 (Table 1). These results indicate that the effect of the age of the calibration points on the clock rate is  
346 modest, and they are corroborated by the observation that MTB mutation rates in vitro and in vivo,  
347 estimated with fluctuation assays and resequencing of strains infecting macaques, are remarkably  
348 similar to the clock rates obtained in our study ( $\sim 3 \times 10^{-8}$  -  $4 \times 10^{-7}$ ; Ford et al. 2011).

349 The aDNA samples considered in this study are not optimal to test the time dependency hypothesis  
350 because they belong to the *M. pinnipedii* clade of the MTB complex (Bos et al. 2014). The modern  
351 strains of this lineage are rarely sampled, because they are infecting seals and sea lions rather than  
352 humans. The only additional aDNA samples available for MTB are L4 samples isolated from 18<sup>th</sup>  
353 century Hungarian mummies (Kay et al. 2013), however these samples are a mix of strains with  
354 different genotypes, and cannot be easily integrated with the data and pipelines used in this study.  
355 Additional aDNA samples from older periods and belonging to other lineages are necessary to better  
356 investigate the time dependency hypothesis in MTB. Recently, Sabin and colleagues (Sabin et al.  
357 unpublished: <https://www.biorxiv.org/content/10.1101/588277v1>) reported the sequencing of a high  
358 quality MTB genome from the 17<sup>th</sup> century, this data will contribute to the investigation of the time  
359 dependency hypothesis in MTB.

360

361



## 362 **Dating MTB phylogenies**

363 In most cases, the goal of molecular clock studies is not to estimate the clock rates, but rather the age of  
364 the phylogenetic tree and of its nodes. Conceptually, this means extrapolating the age of past events  
365 from the temporal information contained in the sample set. If we exclude the few aDNA samples that  
366 are available (Bos et al. 2014, Kay et al. 2015), all MTB data sets have been sampled in the last 40  
367 years. It is therefore evident that the age estimates of recent shallow nodes will be more accurate than  
368 medium and deep nodes. In part, this is reflected in the larger CI and HPD of the age of ancient nodes  
369 compared to more recent ones. Extrapolating the age of trees that are thousands of years old with  
370 contemporary samples is particularly challenging, because the observed data captures only a small  
371 fraction of the sample's evolutionary history, and these are the cases where aDNA samples are most  
372 valuable.

373 Nevertheless, the age of the MRCA of the MTB complex and of its lineages is highly relevant to  
374 understand the emergence and evolution of this pathogen and a debated topic (Wirth et al. 2008, Comas  
375 et al. 2013, Bos et al. 2014). The LSD analyses on the tree rooted with *M. canettii* estimated the MRCA  
376 of the MTB complex to be between 2,828 and 5,758 years old (Sup. Table S3). These results are highly  
377 similar to the ones of Bos and colleagues (2,951 – 5,339) which were obtained with Bayesian  
378 phylogenetics and a much smaller sample size (Bos et al. 2014). These estimates should be taken with  
379 caution because of the intrinsic uncertainty in estimating the age of a tree that is several thousands of  
380 years old, calibrating the molecular clock with the sampling time of modern strains and only 3 aDNA  
381 samples. A more approachable question is the age of the MRCA of the individual MTB lineages. Here  
382 we can consider the results of four different analyses: the LSD and Beast analyses on the individual  
383 lineages (L1-L4, and *M. bovis*), and the LSD and Beast analyses on the complete MTB complex  
384 (including the aDNA samples), from which the age of the MRCA of the lineages can be extracted (L1-

385 L6, and *M. bovis*). When we combined all these results, merging the CI and HPD, we obtained an  
386 estimate of the age of the MTB lineages which accounts for the uncertainty intrinsic in each analysis,  
387 but also for the differences among inference methods and models, thus providing a more conservative  
388 hypothesis. In all our analyses, the point estimates of the age of all lineages resulted to be at most 2,500  
389 years old, and the combined CI and HPD extended to a maximum of 11,000 years ago for L2 (95% CI  
390 of the LSD analysis; Fig. 4, Sup. Table S23). The large CI of L2 was maybe due to among-lineage  
391 variation of the clock rate in L2, as discussed above. While L5, L6 and *M. bovis* have younger MRCAs  
392 and narrower confidence intervals, we should note that for these lineages the sampling is much less  
393 complete compared to L1-L4, and it is possible that further sampling will add more basal strains to the  
394 tree, thus resulting in older MRCAs. For the other lineages, where the sampling is more representative  
395 of the global diversity, the confidence intervals of the age of the MRCAs extend over several thousands  
396 of years, and the point estimates of the four analyses spread over 1,000 – 2,000 years. This shows that  
397 we should be very careful when interpreting the results of tip dating in MTB, especially if our goal is to  
398 estimate the age of ancient nodes such as the MRCAs of MTB lineages. Conservative researchers  
399 might want to use different methods; several model and prior combinations should be formally tested in  
400 Beast, and the final results can be combined in one range providing an estimation of the uncertainty of  
401 the clock rate and of the age of some specific node of the tree.

402 Altogether our results highlight the uncertainty of calibrating MTB trees with tip-dating, they  
403 nevertheless support the results of Bos et al. 2014 that found the MRCA of the MTB complex to be  
404 relatively recent, and not compatible with the out of-Africa-hypothesis (Wirth et al. 2008, Comas et al.  
405 2013) in which the MTB lineage differentiated in concomitance with the dispersal of *Homo sapiens* out  
406 of Africa, about 70,000 years ago. Dating analyses based on DNA samples can only reconstruct the  
407 evolutionary history of the data set as far back as the MRCA of the sample. It is possible that in the  
408 future new lineages will be sampled, and the MTB phylogeny will be updated moving the MRCA

409 further in the past. Additionally, it is also possible that extinct lineages were circulating and causing  
410 diseases much earlier than the MRCA of the strains that are circulating now. This hypothesis is  
411 supported by the detection of molecular markers specific for MTB in archeological samples (reviewed  
412 in Brites and Gagneux 2015), the oldest of them in a bison's bone about 17,500 years old (Rothschild et  
413 al. 2001). Several such studies directly challenge the results of tip-dating presented here because they  
414 reported molecular markers specific to MTB lineages in archeological samples that predate the  
415 appearance of those lineages as estimated by tip dating (Taylor et al. 2007, Hershkovitz et al. 2008,  
416 Nicklisch et al. 2012). However, there is a controversy regarding the specificity of some of the used  
417 markers, and the potential contamination of some of the samples by environmental mycobacteria  
418 (Wilbur et al. 2009, Donoghue et al. 2009).

419 Whole genome sequences from additional aDNA samples are needed to reconcile these two diverging  
420 lines of evidence. Ideally they should belong to different lineages, span different periods, and include  
421 samples older than the currently available aDNA from Peruvian human remains.

422

## 423 **Methods**

### 424 **Bioinformatic pipeline**

425 We identified 21,734 MTB genome sequences from the sequence read archive (Sup. Table S24). All  
426 genome sequences were processed similarly to what was described in Menardo et al. (2018).

427 We removed Illumina adaptors and trimmed low quality reads with Trimmomatic v 0.33  
428 (SLIDINGWINDOW:5:20) (Bolger et al. 2014). We excluded all reads shorter than 20 bp and merged  
429 overlapping paired-end reads with SeqPrep (overlap size = 15) (<https://github.com/jstjohn/SeqPrep>).

430 We mapped the resulting reads to the reconstructed ancestral sequence of the MTBC (Comas et al.  
431 2013) using the mem algorithm implemented in BWA v 0.7.13 (Li and Durbin 2009). Duplicated reads  
432 were marked by the MarkDuplicates module of Picard v 2.9.1  
433 (<https://github.com/broadinstitute/picard>). We performed local realignment around Indel with the  
434 RealignerTargetCreator and IndelRealigner modules of GATK v 3.4.0 (McKenna et al. 2010). We used  
435 Pysam v 0.9.0 (<https://github.com/pysam-developers/pysam>) to exclude reads with alignment score  
436 lower than  $(0.93 * \text{read\_length}) - (\text{read\_length} * 4 * 0.07)$ : this corresponds to more than 7 miss-matches  
437 per 100 bp. We called SNPs with Samtools v 1.2 mpileup (Li 2008) and VarScan v 2.4.1 (Koboldt et  
438 al. 2012) using the following thresholds: minimum mapping quality of 20; minimum base quality at a  
439 position of 20; minimum read depth at a position of 7X; minimum percentage of reads supporting the  
440 call 90%; no more than 90%, or less than 10% of reads supporting a call in the same orientation (strand  
441 bias filter). SNPs in previously defined repetitive regions were excluded (Comas et al. 2013). We  
442 excluded all strains with average coverage  $< 15 X$ . Additionally, we excluded genomes with more than  
443 50% of the SNPs excluded due to the strand bias filter, and genomes with more than 50% of SNPs with  
444 a percentage of reads supporting the call included between 10% and 90%. We filtered out genomes  
445 with phylogenetic SNPs belonging to different lineages or sub-lineages (only for L4) of MTB, as this is  
446 an indication that a mix of strains could have been sequenced. To do this, we used the diagnostic SNPs  
447 obtained from Steiner et al. 2014 and Stucki et al. 2016 for L4 sub-lineages. We excluded all strains  
448 for which we could not find the date of isolation 1) in the SRA meta-information, 2) in the associated  
449 publications, 3) from the authors of the original study after inquiry. We divided all remaining strains by  
450 lineage (L1 -L6 and *M. bovis*), and excluded strains with a number of called SNPs deviating more than  
451 three standard deviations from the mean of the respective lineage. We built SNPs alignments for all  
452 lineages including only variable positions with less than 10% of missing data. Finally, we excluded all  
453 genomes with more than 10% of missing data in the alignment of the respective lineage. After all

454 filtering steps, we were able to retrieve 6,285 strains with high quality genome sequences and an  
455 associated date of sampling (Sup. Table S1).

456

## 457 **Dataset subdivision**

458 To perform a systematic analysis of the molecular clock in MTB we considered different data sets:

459 1) the complete data set (6,285 strains)

460 2) the different lineages of MTB (L1, L2, L3, L4, L5, L6, *M. bovis*)

461 3) the sub-lineages of L1 (L1.1.1, L1.1.1.1, L1.1.2, L1.1.3, L1.2.1 and L1.2.2) and L2 (L2.1, L2.2.1,

462 L2.2.2 and L2.2.1.1) as defined by Coll et al. 2014; the sub-lineages of L4 (L4.1.1, L4.1.2, L4.1.3,

463 L4.4, L4.5, L4.6.1 and L4.10) as defined by Stucki et al . 2016. Additionally, we identified two L4

464 clades that were not classified by the diagnostic SNPs of Stucki et al. 2016 (L4\_nc and L4.1\_nc,

465 respectively, included into L4.6.2 and L4.1.2 as defined by Coll et al. 2014), and three sub-clades of

466 L2.2.1 that were not previously designated as sub-lineages (L2.2.1\_nc1, L2.2.1\_nc2 and L2.2.1\_nc3)

467 (Supplementary Figs. S11-S13).

468 4) Selected data sets representing outbreaks or local populations that have been used for molecular

469 clock analyses in other studies

470 Lee et al. 2015 - Mj clade outbreak among a Inuit population in Canada (L4)

471 Eldholm et al. 2015 - Multi-drug resistant outbreak in Argentina (L4)

472 Eldholm et al. 2016 – Afghan family outbreak in Oslo (L2)

473 Trewby et al. 2016 – *M. bovis* in Northern Ireland

474 Crispell et al. 2017 – *M. bovis* in New Zealand

475 Folkvardsen et al. 2017 - C2/1112-15 outbreak in Denmark (L4)

476 Bainomugisa et al. 2018 – Multi-drug resistant outbreak on Daru island in PNG (L2)

477

## 478 **LSD analysis**

479 For all data sets, we assembled SNPs alignments including variable positions with less than 10% of  
480 missing data. We inferred phylogenetic trees with raxml 8.2.11 using a GTR model (-m GTRCAT -V  
481 options). Since the alignments contained only variable positions, we rescaled the branch lengths of the  
482 trees  $\text{rescaled\_branch\_length} = ((\text{branch\_length} * \text{alignment\_lengths}) / (\text{alignment\_length} +$   
483  $\text{invariant\_sites}))$ , Duchene and colleagues (Duchene et al. 2018) showed that this method produced  
484 similar results compared to ascertainment bias correction. We then used the R package ape (Paradis et  
485 al. 2018) to perform root to tip regression after rooting the trees in the position that minimizes the sum  
486 of the squared residuals from the regression line. Root to tip regression is only recommended for  
487 exploratory analyses of the temporal structure of a dataset and it should not be used for hypothesis  
488 testing (Rambaut et al. 2016). A more rigorous approach is the date randomization test (DRT)(Ramsden  
489 et al. 2008), in which the sampling dates are reshuffled randomly among the taxa and the estimated  
490 molecular clock rates estimated from the observed data is compared with the estimates obtained with  
491 the reshuffled data sets. This test can show that the observed data has more temporal information than  
492 data with random sampling times. For each dataset, we used the least square method implemented in  
493 LSD v0.3-beta (To et al. 2015) to estimate the molecular clock in the observed data and in 100  
494 randomized replicates. To do this, we used the QPD algorithm allowing it to estimate the position of the  
495 root (option -r a) and calculating the confidence interval (options -f 100 and -s). We defined three  
496 different significance levels for the DRT: 1) the simple test is passed when the clock rate estimate for  
497 the observed data does not overlap with the range of estimates obtained from the randomized sets. 2)

498 The intermediate test is passed when the clock rate estimate for the observed data does not overlap with  
499 the confidence intervals of the estimates obtained from the randomized sets. 3) The stringent test is  
500 passed when the confidence interval of the clock rate estimate for the observed data does not overlap  
501 with the confidence intervals of the estimates obtained from the randomized sets.

502

### 503 **Bayesian phylogenetic analysis**

504 Bayesian molecular clock analyses are computationally demanding and problematic to run on large  
505 data sets. Therefore we reduced the thirteen largest data sets (MTBC, L1, L1.1.1, L1.1.1.1, L2, L2.2.1,  
506 L2.2.1.1, L2.2.1\_nc1, L2.2.1\_nc3, L4, L4.1.2, L4.10 and *M. bovis*) to 300 randomly selected strains.

507 For each data set we used the Bayesian information criterion implemented in jModelTest 2.1.10  
508 v20160303 (Darriba et al. 2012) to identify the best fitting nucleotide substitution model among 11  
509 possible schemes including unequal nucleotide frequencies (total models = 22, options -s 11 and -f).  
510 We performed Bayesian inference with Beast2 (Bouckaert et al. 2014). We corrected the xml file to  
511 specify the number of invariant sites as indicated here: [https://groups.google.com/forum/#!topic/beast-](https://groups.google.com/forum/#!topic/beast-users/QfBHMOqImFE)  
512 [users/QfBHMOqImFE](https://groups.google.com/forum/#!topic/beast-users/QfBHMOqImFE), and used the tip sampling year as calibration.

513 We ran four Beast analyses with different settings: we used a relaxed lognormal clock model  
514 (Drummond et al. 2006), the best fitting nucleotide substitution model according to the results of  
515 jModelTest, and two different coalescent priors: constant population size and exponential population  
516 growth (or shrinkage). We chose a  $1/x$  prior for the population size  $[0- 10^9]$ , two different priors for the  
517 mean of the lognormal distribution of the clock rate ( $1/x$  and uniform)  $[10^{-10} - 10^{-5}]$ , a normal(0,1) prior  
518 for the standard deviation of the lognormal distribution of the clock rate  $[0 - \text{infinity}]$ . For the  
519 exponential growth rate prior, we used the standard Laplace distribution  $[-\text{infinity} - \text{infinity}]$ . For all  
520 data sets, we ran at least two runs, we used Tracer 1.7.1 (Rambaut et al. 2018) to identify and exclude

521 the burn-in, to evaluate convergence among runs and to calculate the estimated sample size (ESS). We  
522 stopped the runs when at least two chains reached convergence, and the ESS of the posterior and of all  
523 parameters were larger than 200.

524

## 525 **Analyses with the complete MTB complex and aDNA**

526 We analyzed the complete data set of 6,285 genomes with the same methods described above. The only  
527 difference was that for the LSD analysis, we rooted the input tree using *Mycobacterium canetti*  
528 (SAMN00102920, SRR011186) as outgroup. We did this because we noticed that without outgroup, all  
529 methods placed the root on the branch separating *M. bovis* from all other lineages, and not on the  
530 branch separating MTB *sensu stricto* from the other lineages.

531 To test the time dependency hypothesis, we repeated the LSD and Beast analyses on the MTB complex,  
532 adding the aDNA genome sequences of three MTB strains obtained from Precolumbian Peruvian  
533 human remains (Bos et al. 2014). These are the most ancient aDNA samples available for MTB. For  
534 LSD, we assigned as sampling year the confidence interval of the radiocarbon dating reported in the  
535 original publication. For Beast, we assigned uniform priors spanning the confidence interval but we  
536 failed to reach convergence, therefore we used the mean of the maximum and minimum years in the  
537 confidence interval (SAMN02727818: 1126 [1028-1224], SAMN02727820: 1117 [1023 - 1211] ,  
538 SAMN02727821: 1211 [1141 – 1280]). We ran three different analyses with Beast: we used the sub-  
539 sample of 300 strains with two different priors on the clock rate (1/x and uniform), and an independent  
540 sub-sample of 500 strain, for this last data set (500 strains) we assumed a HKY model and used a  
541 uniform prior on the clock rate (Sup. Table S3).



542 To summarize the results of the Beast analysis with the aDNA samples and retrieve the age of the  
543 MRCA of the individual lineages, we considered the analysis performed on the subset of 500 strains:  
544 we randomly sampled 5,000 trees from the posterior (after excluding the burn-in), and calculated the  
545 Maximum clade credibility tree with the software Treeannotator v2.5.0.

546

## 547 **Acknowledgments**

548 Calculations were performed at sciCORE (<http://scicore.unibas.ch/>) scientific computing core facility at  
549 the University of Basel. This work was supported by the Swiss National Science Foundation (grants  
550 310030\_166687, IZRJZ3\_164171, IZLSZ3\_170834 and CRSII5\_177163), the European Research  
551 Council (309540-EVODRTB) and SystemsX.ch. SD was supported by a McKenzie fellowship from the  
552 University of Melbourne.

553

554

555

556

557

558

559

## 560 **References**

- 561 Bainomugisa, A., Lavu, E., Hiashiri, S., Majumdar, S., Honjepari, A., Moke, R., ... & Coulter, C.  
562 (2018). Multi-clonal evolution of multi-drug-resistant/extensively drug-resistant Mycobacterium  
563 tuberculosis in a high-prevalence setting of Papua New Guinea for over three decades. *Microbial*  
564 *genomics*, 4(2).
- 565
- 566 Bolger, A. M., Lohse, M., & Usadel, B. (2014). Trimmomatic: A flexible trimmer for Illumina  
567 Sequence Data. *Bioinformatics*, 30(15), 2114-2120.
- 568
- 569 Bos, K. I., Harkins, K. M., Herbig, A., Coscolla, M., Weber, N., Comas, I., ... & Campbell, T. J. (2014).  
570 Pre-Columbian mycobacterial genomes reveal seals as a source of New World human tuberculosis.  
571 *Nature*, 514(7523), 494.
- 572
- 573 Bouckaert, R., Heled, J., Kühnert, D., Vaughan, T., Wu, C. H., Xie, D., ... & Drummond, A. J. (2014).  
574 BEAST 2: a software platform for Bayesian evolutionary analysis. *PLoS computational biology*, 10(4),  
575 e1003537.
- 576
- 577 Brites, D., Loiseau, C., Menardo, F., Borrell, S., Boniotti, M. B., Warren, R., ... & Fyfe, J. A. (2018). A  
578 New Phylogenetic Framework for the Animal-adapted Mycobacterium tuberculosis Complex.  
579 *Frontiers in Microbiology*, 9.
- 580
- 581 Bromham, L., & Penny, D. (2003). The modern molecular clock. *Nature Reviews Genetics*, 4(3), 216.  
582
- 583 Bromham, L., Duchêne, S., Hua, X., Ritchie, A. M., Duchêne, D. A., & Ho, S. Y. (2018). Bayesian  
584 molecular dating: opening up the black box. *Biological Reviews*, 93(2), 1165-1191.
- 585
- 586 Brosch, R., Gordon, S. V., Marmiesse, M., Brodin, P., Buchrieser, C., Eiglmeier, K., ... & Parsons, L.  
587 M. (2002). A new evolutionary scenario for the Mycobacterium tuberculosis complex. *Proceedings of*  
588 *the national academy of Sciences*, 99(6), 3684-3689.

589

590 Brynildsrud, O. B., Pepperell, C. S., Suffys, P., Grandjean, L., Monteserin, J., Debech, N., ... &  
591 Fandinho, F. (2018). Global expansion of Mycobacterium tuberculosis lineage 4 shaped by colonial  
592 migration and local adaptation. *Science Advances*, 4(10), eaat5869.

593

594 Coll, F., McNerney, R., Guerra-Assuncao, J. A., Glynn, J. R., Perdigao, J., Viveiros, M., ... & Clark, T.  
595 G. (2014). A robust SNP barcode for typing Mycobacterium tuberculosis complex strains. *Nature*  
596 *communications*, 5, 4812.

597

598 Comas, I., Coscolla, M., Luo, T., Borrell, S., Holt, K. E., Kato-Maeda, M., ... & Gagneu, S. (2013).  
599 Out-of-Africa migration and Neolithic coexpansion of Mycobacterium tuberculosis with modern  
600 humans. *Nature genetics*, 45(10), 1176.

601

602 Crispell, J., Zadoks, R. N., Harris, S. R., Paterson, B., Collins, D. M., de-Lisle, G. W., ... & Kao, R. R.  
603 (2017). Using whole genome sequencing to investigate transmission in a multi-host system: bovine  
604 tuberculosis in New Zealand. *BMC genomics*, 18(1), 180.

605

606 Darriba, D., Taboada, G. L., Doallo, R., & Posada, D. (2012). jModelTest 2: more models, new  
607 heuristics and parallel computing. *Nature methods*, 9(8), 772.

608

609 de Steenwinkel, J. E., Marian, T., de Knegt, G. J., Kremer, K., Aarnoutse, R. E., Boeree, M. J., ... &  
610 Bakker-Woudenberg, I. A. (2012). Drug susceptibility of Mycobacterium tuberculosis Beijing  
611 genotype and association with MDR TB. *Emerging infectious diseases*, 18(4), 660.

612

613 Donoghue, H. D., Hershkovitz, I., Minnikin, D. E., Besra, G. S., Lee, O. Y. C., Galili, E., ... & Bar-Gal,  
614 G. K. (2009). Biomolecular archaeology of ancient tuberculosis: response to “Deficiencies and  
615 challenges in the study of ancient tuberculosis DNA” by Wilbur et al.(2009). *Journal of Archaeological*  
616 *Science*, 36(12), 2797-2804.

617

- 618 Drummond, A. J., Pybus, O. G., Rambaut, A., Forsberg, R., & Rodrigo, A. G. (2003). Measurably  
619 evolving populations. *Trends in ecology & evolution*, *18*(9), 481-488.
- 620
- 621 Drummond, A. J., Ho, S. Y., Phillips, M. J., & Rambaut, A. (2006). Relaxed phylogenetics and dating  
622 with confidence. *PLoS biology*, *4*(5), e88.
- 623
- 624 Duchêne, S., Holmes, E. C., & Ho, S. Y. (2014). Analyses of evolutionary dynamics in viruses are  
625 hindered by a time-dependent bias in rate estimates. *Proc. R. Soc. B*, *281*(1786), 20140732.
- 626
- 627 Duchêne, S., Duchêne, D., Holmes, E. C., & Ho, S. Y. (2015). The performance of the date-  
628 randomization test in phylogenetic analyses of time-structured virus data. *Molecular Biology and*  
629 *Evolution*, *32*(7), 1895-1906.
- 630
- 631 Duchêne, S., Geoghegan, J. L., Holmes, E. C., & Ho, S. Y. (2016 a). Estimating evolutionary rates  
632 using time-structured data: a general comparison of phylogenetic methods. *Bioinformatics*, *32*(22),  
633 3375-3379.
- 634
- 635 Duchêne, S., Holt, K. E., Weill, F. X., Le Hello, S., Hawkey, J., Edwards, D. J., ... & Holmes, E. C.  
636 (2016 b). Genome-scale rates of evolutionary change in bacteria. *Microbial Genomics*, *2*(11).
- 637
- 638 Duchêne, S., Duchene, D. A., Geoghegan, J. L., Dyson, Z. A., Hawkey, J., & Holt, K. E. (2018).  
639 Inferring demographic parameters in bacterial genomic data using Bayesian and hybrid phylogenetic  
640 methods. *BMC evolutionary biology*, *18*(1), 95.
- 641
- 642 Eldholm, V., Monteserin, J., Rieux, A., Lopez, B., Sobkowiak, B., Ritacco, V., & Balloux, F. (2015).  
643 Four decades of transmission of a multidrug-resistant Mycobacterium tuberculosis outbreak strain.  
644 *Nature communications*, *6*, 7119.
- 645
- 646 Eldholm, V., Pettersson, J. H. O., Brynildsrud, O. B., Kitchen, A., Rasmussen, E. M., Lillebaek, T., ... &  
647 Alfsnes, K. (2016). Armed conflict and population displacement as drivers of the evolution and  
648 dispersal of Mycobacterium tuberculosis. *Proceedings of the National Academy of Sciences*, *113*(48),  
649 13881-13886.

650

651 Emerson, B. C., & Hickerson, M. J. (2015). Lack of support for the time-dependent molecular  
652 evolution hypothesis. *Molecular ecology*, 24(4), 702-709.

653

654 Folkvardsen, D. B., Norman, A., Andersen, Å. B., Michael Rasmussen, E., Jelsbak, L., & Lillebaek, T.  
655 (2017). Genomic Epidemiology of a Major Mycobacterium tuberculosis Outbreak: Retrospective  
656 Cohort Study in a Low-Incidence Setting Using Sparse Time-Series Sampling. *The Journal of*  
657 *infectious diseases*, 216(3), 366-374.

658

659 Ford, C. B., Lin, P. L., Chase, M. R., Shah, R. R., Iartchouk, O., Galagan, J., ... & Flynn, J. L. (2011).  
660 Use of whole genome sequencing to estimate the mutation rate of Mycobacterium tuberculosis during  
661 latent infection. *Nature genetics*, 43(5), 482.

662

663 Ford, C. B., Shah, R. R., Maeda, M. K., Gagneux, S., Murray, M. B., Cohen, T., ... & Fortune, S. M.  
664 (2013). Mycobacterium tuberculosis mutation rate estimates from different lineages predict substantial  
665 differences in the emergence of drug-resistant tuberculosis. *Nature genetics*, 45(7), 784.

666

667 Glynn, J. R., Kremer, K., Borgdorff, M. W., Rodriguez, M. P., & Soolingen, D. V. (2006). Beijing/W  
668 genotype Mycobacterium tuberculosis and drug resistance.

669

670 Hanekom, M., Mata, D., van Pittius, N. G., van Helden, P. D., Warren, R. M., & Hernandez-Pando, R.  
671 (2010). Mycobacterium tuberculosis strains with the Beijing genotype demonstrate variability in  
672 virulence associated with transmission. *Tuberculosis*, 90(5), 319-325.

673

674 Hatherell, H. A., Colijn, C., Stagg, H. R., Jackson, C., Winter, J. R., & Abubakar, I. (2016).  
675 Interpreting whole genome sequencing for investigating tuberculosis transmission: a systematic review.  
676 *BMC medicine*, 14(1), 21.

677

678 Hershberg, R., Lipatov, M., Small, P. M., Sheffer, H., Niemann, S., Homolka, S., ... & Gagneux, S.  
679 (2008). High functional diversity in Mycobacterium tuberculosis driven by genetic drift and human  
680 demography. *PLoS biology*, 6(12), e311.

681

- 682 Hershkovitz, I., Donoghue, H. D., Minnikin, D. E., Besra, G. S., Lee, O. Y., Gernaey, A. M., ... & Bar-  
683 Gal, G. K. (2008). Detection and molecular characterization of 9000-year-old Mycobacterium  
684 tuberculosis from a Neolithic settlement in the Eastern Mediterranean. *PloS one*, 3(10), e3426.  
685
- 686 Ho, S. Y., Phillips, M. J., Cooper, A., & Drummond, A. J. (2005). Time dependency of molecular rate  
687 estimates and systematic overestimation of recent divergence times. *Molecular biology and evolution*,  
688 22(7), 1561-1568.  
689
- 690 Ho, S. Y., Lanfear, R., Bromham, L., Phillips, M. J., Soubrier, J., Rodrigo, A. G., & Cooper, A. (2011).  
691 Time-dependent rates of molecular evolution. *Molecular ecology*, 20(15), 3087-3101.  
692
- 693 Holt, K. E., McAdam, P., Thai, P. V. K., Thuong, N. T. T., Ha, D. T. M., Lan, N. N., ... & Thwaites, G.  
694 (2018). Frequent transmission of the Mycobacterium tuberculosis Beijing lineage and positive selection  
695 for the EsxW Beijing variant in Vietnam. *Nature genetics*, 1.  
696
- 697 Kapur, V., Whittam, T. S., & Musser, J. M. (1994). Is Mycobacterium tuberculosis 15,000 years old?.  
698 *Journal of Infectious Diseases*, 170(5), 1348-1349.  
699
- 700 Kay, G. L., Sergeant, M. J., Zhou, Z., Chan, J. Z. M., Millard, A., Quick, J., ... & Achtman, M. (2015).  
701 Eighteenth-century genomes show that mixed infections were common at time of peak tuberculosis in  
702 Europe. *Nature communications*, 6, 6717.
- 703 Kimura, M. (1968). Evolutionary rate at the molecular level. *Nature*, 217(5129), 624-626.  
704
- 705 Korber, B., Muldoon, M., Theiler, J., Gao, F., Gupta, R., Lapedes, A., ... & Bhattacharya, T. (2000).  
706 Timing the ancestor of the HIV-1 pandemic strains. *science*, 288(5472), 1789-1796.  
707
- 708 Koboldt, D., Zhang, Q., Larson, D., Shen, D., McLellan, M., Lin, L., Miller, C., Mardis, E., Ding, L., &  
709 Wilson, R. (2012). VarScan 2: Somatic mutation and copy number alteration discovery in cancer by  
710 exome sequencing *Genome Research*, 22(3), 568-576.  
711

- 712 Kühnert, D., Coscolla, M., Brites, D., Stucki, D., Metcalfe, J., Fenner, L., ... & Stadler, T. (2018).  
713 Tuberculosis outbreak investigation using phylodynamic analysis. *Epidemics*, 25, 47-53.  
714
- 715 Lee, R. S., Radomski, N., Proulx, J. F., Levade, I., Shapiro, B. J., McIntosh, F., ... & Behr, M. A.  
716 (2015). Population genomics of *Mycobacterium tuberculosis* in the Inuit. *Proceedings of the National*  
717 *Academy of Sciences*, 112(44), 13609-13614.  
718
- 719 Li H. and Durbin R. (2009) Fast and accurate short read alignment with Burrows-Wheeler Transform.  
720 *Bioinformatics*, 25:1754-60.  
721
- 722 Li H. (2011). A statistical framework for SNP calling, mutation discovery, association mapping and  
723 population genetical parameter estimation from sequencing data. *Bioinformatics*, 27(21):2987-93.  
724
- 725 Liu, Q., Ma, A., Wei, L., Pang, Y., Wu, B., Luo, T., ... & Gao, Q. (2018). China's tuberculosis epidemic  
726 stems from historical expansion of four strains of *Mycobacterium tuberculosis*. *Nature ecology &*  
727 *evolution*, 1.  
728
- 729 McKenna A, Hanna M, Banks E, Sivachenko A, Cibulskis K, Kernytsky A, Garimella K, Altshuler D,  
730 Gabriel S, Daly M, DePristo MA, (2010). The Genome Analysis Toolkit: a MapReduce framework for  
731 analyzing next-generation DNA sequencing data. *Genome Research*, 20:1297-303.  
732
- 733 Menardo, F., Loiseau, C., Brites, D., Coscolla, M., Gygli, S. M., Rutaihwa, L. K., ... & Gagneux, S.  
734 (2018). Treemmer: a tool to reduce large phylogenetic datasets with minimal loss of diversity. *BMC*  
735 *bioinformatics*, 19(1), 164.  
736
- 737 Merker, M., Blin, C., Mona, S., Duforet-Frebourg, N., Lecher, S., Willery, E., ... & Allix-Béguet, C.  
738 (2015). Evolutionary history and global spread of the *Mycobacterium tuberculosis* Beijing lineage.  
739 *Nature genetics*, 47(3), 242.  
740
- 741 Merker, M., Barbier, M., Cox, H., Rasigade, J. P., Feuerriegel, S., Kohl, T. A., ... & Andres, S. (2018).  
742 Compensatory evolution drives multidrug-resistant tuberculosis in Central Asia. *eLife*, 7:e38200.

743

744 Möller, S., du Plessis, L., & Stadler, T. (2018). Impact of the tree prior on estimating clock rates during  
745 epidemic outbreaks. *Proceedings of the National Academy of Sciences*, *115*(16), 4200-4205.

746

747 Morgan, G. J. (1998). Emile Zuckerkandl, Linus Pauling, and the molecular evolutionary clock, 1959–  
748 1965. *Journal of the History of Biology*, *31*(2), 155-178.

749

750 Mostowy, S., Cousins, D., Brinkman, J., Aranaz, A., & Behr, M. A. (2002). Genomic deletions suggest  
751 a phylogeny for the Mycobacterium tuberculosis complex. *The Journal of infectious diseases*, *186*(1),  
752 74-80.

753

754 Nicklisch, N., Maixner, F., Ganslmeier, R., Friederich, S., Dresely, V., Meller, H., ... & Alt, K. W.  
755 (2012). Rib lesions in skeletons from early neolithic sites in Central Germany: on the trail of  
756 tuberculosis at the onset of agriculture. *American journal of physical anthropology*, *149*(3), 391-404.

757

758 Ohta, T. (1987). Very slightly deleterious mutations and the molecular clock. *Journal of Molecular*  
759 *Evolution*, *26*(1-2), 1-6.

760

761 Paradis, E., Schliep, K., & Schwartz, R. (2018). ape 5.0: an environment for modern phylogenetics and  
762 evolutionary analyses in R. *Bioinformatics*, *1*, 3.

763

764 Pepperell, C. S., Casto, A. M., Kitchen, A., Granka, J. M., Cornejo, O. E., Holmes, E. C., ... &  
765 Feldman, M. W. (2013). The role of selection in shaping diversity of natural M. tuberculosis  
766 populations. *PLoS pathogens*, *9*(8), e1003543

767

768 Picard: <https://github.com/broadinstitute/picard>.

769

770 Rambaut, A., Lam, T. T., Max Carvalho, L., & Pybus, O. G. (2016). Exploring the temporal structure of  
771 heterochronous sequences using TempEst (formerly Path-O-Gen). *Virus evolution*, *2*(1), vew007.

772

773 Rambaut, A., Drummond, A. J., Xie, D., Baele, G., & Suchard, M. A. (2018). Posterior summarisation  
774 in Bayesian phylogenetics using Tracer 1.7. *Syst. Biol*, *10*.



775

776 Ramsden, C., Melo, F. L., Figueiredo, L. M., Holmes, E. C., Zanotto, P. M., & VGDN Consortium.  
777 (2008). High rates of molecular evolution in hantaviruses. *Molecular Biology and Evolution*, 25(7),  
778 1488-1492.

779

780 Ribeiro, S. C., Gomes, L. L., Amaral, E. P., Andrade, M. R., Almeida, F. M., Rezende, A. L., ... &  
781 Lasunskiaia, E. B. (2014). Mycobacterium tuberculosis strains of the modern sublineage of the Beijing  
782 family are more likely to display increased virulence than strains of the ancient sublineage. *Journal of*  
783 *clinical microbiology*, JCM-00498.

784

785 Rieux, A., Eriksson, A., Li, M., Sobkowiak, B., Weinert, L. A., Warmuth, V., ... & Balloux, F. (2014).  
786 Improved calibration of the human mitochondrial clock using ancient genomes. *Molecular Biology and*  
787 *Evolution*, 31(10), 2780-2792.

788

789 Rieux, A., & Balloux, F. (2016). Inferences from tip-calibrated phylogenies: a review and a practical  
790 guide. *Molecular ecology*, 25(9), 1911-1924.

791

792 Rothschild, B. M., Martin, L. D., Lev, G., Bercovier, H., Bar-Gal, G. K., Greenblatt, C., ... & Brittain,  
793 D. (2001). Mycobacterium tuberculosis complex DNA from an extinct bison dated 17,000 years before  
794 the present. *Clinical Infectious Diseases*, 33(3), 305-311.

795

796 Rutaihwa, L. K., Menardo, F., Stucki, D., Gygli, S. M., Ley, S. D., Malla, B., ... & Carter, J. E. (2019).  
797 Multiple Introductions of the Mycobacterium tuberculosis Lineage 2 Beijing into Africa over centuries.  
798 *Frontiers in Ecology and Evolution* (in press).

799

800 Seo, T. K., Thorne, J. L., Hasegawa, M., & Kishino, H. (2002). A viral sampling design for testing the  
801 molecular clock and for estimating evolutionary rates and divergence times. *Bioinformatics*, 18(1), 115-  
802 123.

803

804 SeqPrep: <https://github.com/jstjohn/SeqPrep>.

805

- 806 Stamatakis, A. (2014). RAxML version 8: a tool for phylogenetic analysis and post-analysis of large  
807 phylogenies. *Bioinformatics*, 30(9), 1312-1313.
- 808
- 809 Steiner, A., Stucki, D., Coscolla, M., Borrell, S., & Gagneux, S. (2014). KvarQ: targeted and direct  
810 variant calling from fastq reads of bacterial genomes. *BMC genomics*, 15(1), 881.
- 811
- 812 Stimson, J., Gardy, J., Mathema, B., Crudu, V., Cohen, T., & Colijn, C. (2019). Beyond the SNP  
813 threshold: identifying outbreak clusters using inferred transmissions. *Molecular biology and evolution*,  
814 36(3), 587-603.
- 815
- 816 Stucki, D., Brites, D., Jeljeli, L., Coscolla, M., Liu, Q., Trauner, A., ... & Gao, Q. (2016).  
817 Mycobacterium tuberculosis lineage 4 comprises globally distributed and geographically restricted  
818 sublineages. *Nature genetics*, 48(12), 1535.
- 819
- 820 Taylor, G. M., Murphy, E., Hopkins, R., Rutland, P., & Chistov, Y. (2007). First report of  
821 Mycobacterium bovis DNA in human remains from the Iron Age. *Microbiology*, 153(4), 1243-1249.
- 822
- 823 To, T. H., Jung, M., Lycett, S., & Gascuel, O. (2015). Fast dating using least-squares criteria and  
824 algorithms. *Systematic biology*, 65(1), 82-97.
- 825
- 826 Tong, K. J., Duchêne, D. A., Duchêne, S., Geoghegan, J. L., & Ho, S. Y. (2018). A comparison of  
827 methods for estimating substitution rates from ancient DNA sequence data. *BMC evolutionary*  
828 *biology*, 18(1), 70.
- 829
- 830 Trewby, H., Wright, D., Breadon, E. L., Lycett, S. J., Mallon, T. R., McCormick, C., ... & Herzyk, P.  
831 (2016). Use of bacterial whole-genome sequencing to investigate local persistence and spread in bovine  
832 tuberculosis. *Epidemics*, 14, 26-35.
- 833
- 834 WHO. Global Tuberculosis Report (2018) [http://www.who.int/tb/publications/global\\_report/en/](http://www.who.int/tb/publications/global_report/en/)

835 Wiens, K. E., Woyczynski, L. P., Ledesma, J. R., Ross, J. M., Zenteno-Cuevas, R., Goodridge, A., ... &  
836 Ray, S. E. (2018). Global variation in bacterial strains that cause tuberculosis disease: a systematic  
837 review and meta-analysis. *BMC medicine*, *16*(1), 196.

838

839 Wilbur, A. K., Bouwman, A. S., Stone, A. C., Roberts, C. A., Pfister, L. A., Buikstra, J. E., & Brown,  
840 T. A. (2009). Deficiencies and challenges in the study of ancient tuberculosis DNA. *Journal of*  
841 *Archaeological Science*, *36*(9), 1990-1997.

842

843 Wirth, T., Hildebrand, F., Allix-Béguet, C., Wölbeling, F., Kubica, T., Kremer, K., ... & Meyer, A.  
844 (2008). Origin, spread and demography of the Mycobacterium tuberculosis complex. *PLoS pathogens*,  
845 *4*(9), e1000160.

846

847 Zuckerkandl, E., & Pauling, L. (1962). Molecular disease, evolution and genetic heterogeneity.

848

849

850

851

852

853

854

855

856

857

858

859 **Table1**

860 Results of LSD and Beast for the MTB complex with and without aDNA samples. With Beast we  
861 performed three different analyses, two using a sub-sample of 300 strains and different priors on the  
862 clock rate (1/x and uniform), and one using a sub-sample of 500 strains (Methods, Sup. Table S3))

| <b>Dataset</b>                           | <b>Clock rate</b>                 |
|------------------------------------------|-----------------------------------|
| MTBC 6,285 + M. canettii (LSD)           | 5.59E-08 (4.12E-08, 6.17E-08)     |
| MTBC 6,285 + M. canettii + aDNA<br>(LSD) | 6.93E-08 (5.48E-08, 8.42E-08)     |
| MTBC 300 (Beast 1/x)                     | 8.2254E-08 (4.964E-08, 1.141E-07) |
| MTBC 300 +aDNA (Beast 1/x)               | 7.3978E-08 (4.648E-08, 1.019E-07) |
| MTBC 300 (Beast unif)                    | 8.26E-08 (4.82E-08, 1.14E-07)     |
| MTBC 300 +aDNA (Beast unif)              | 7.1794E-08 (4.157E-08, 9.851E-08) |
| MTBC 500 (Beast unif)                    | 6.08E-08 (4.21E-08, 8.07E-08)     |
| MTBC 500 +aDNA (Beast unif)              | 5.20E-08 (3.41E-08, 7.12E-08)     |

863

864

865

866

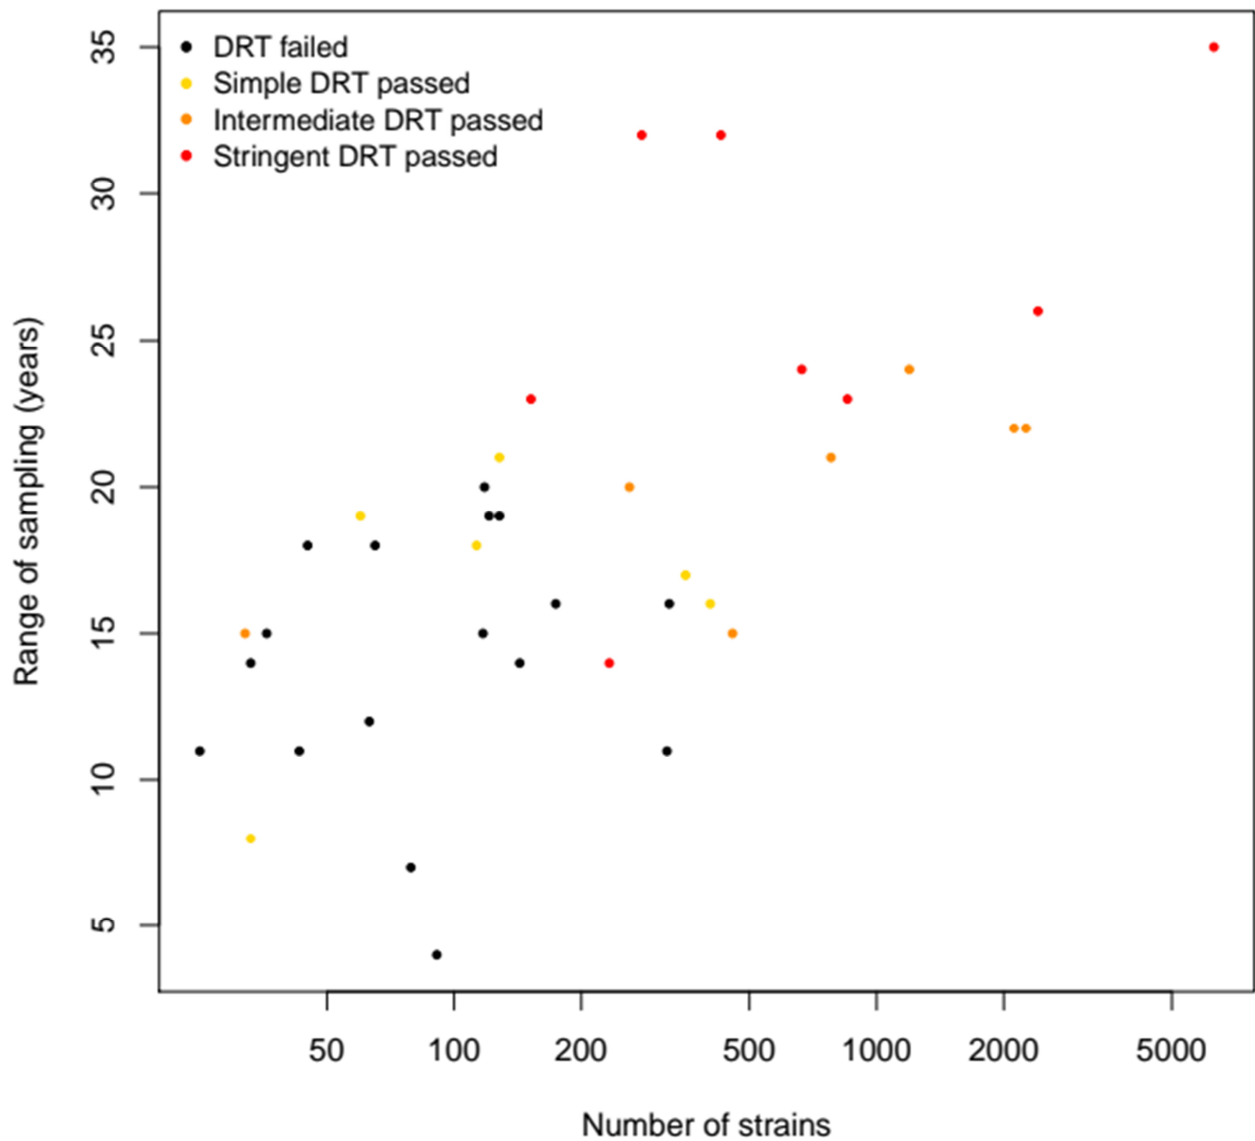

867

868

869 **Figure 1.** Results of the DRT for all data sets ordered by size and temporal range. Data sets with fewer  
870 strains sampled in a shorter period of time tended to fail the DRT.

871

872

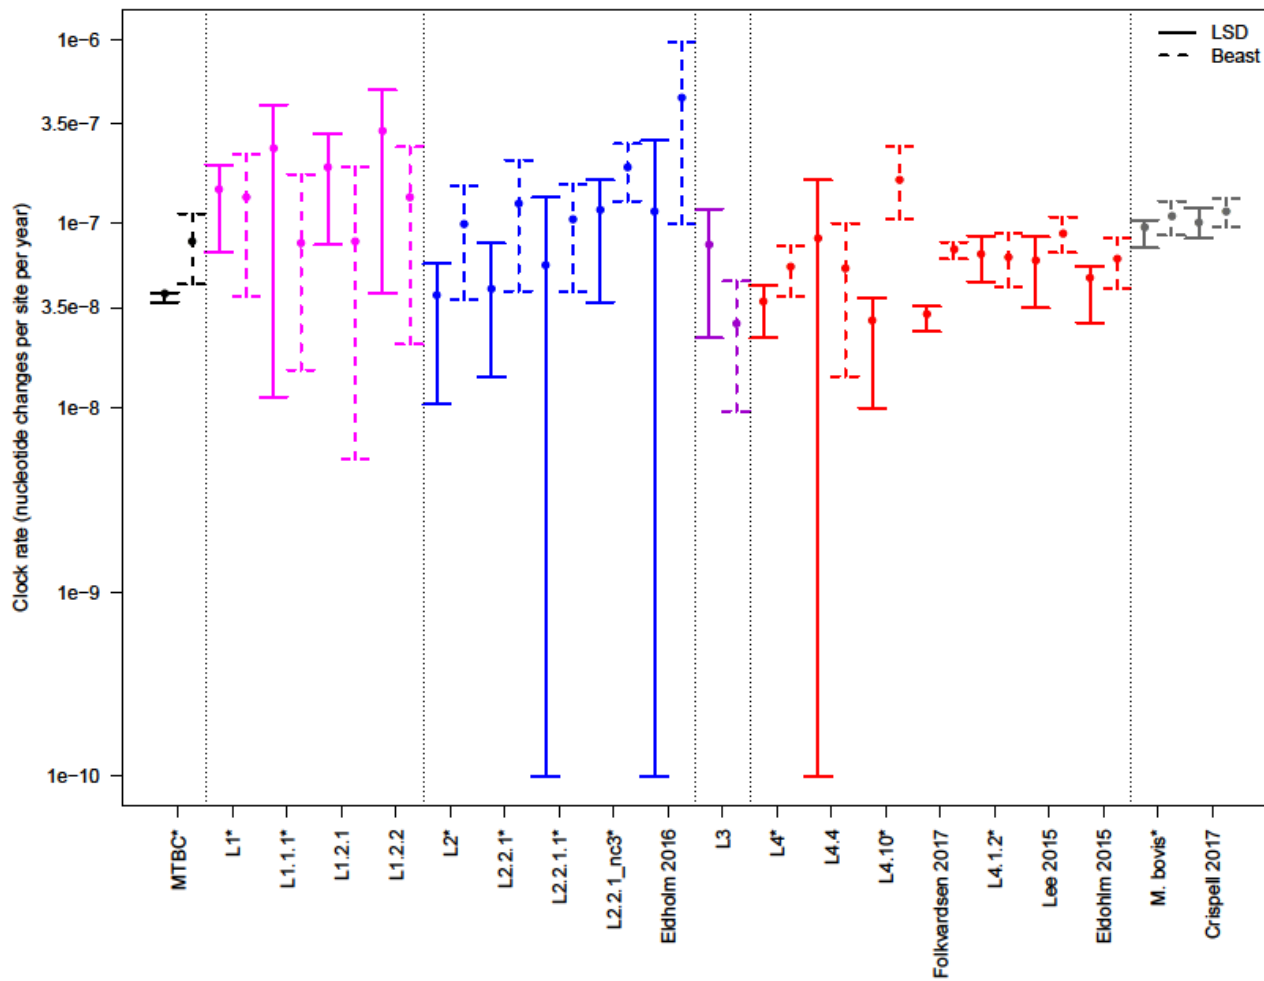

873

874 **Figure 2.** Estimated clock rates of all lineages, sub-lineages and local data sets that passed the DRT.

875 Solid lines represent the 95% confidence interval estimated with LSD, dashed lines represent the 95%

876 highest posterior density (HPD) estimated by Beast (the larger dot is the median of the posterior

877 distribution). We show here the results of the Beast analysis with the 1/x prior on the clock rate. For

878 data sets that rejected the constant population size, we show the result obtained with the exponential

879 population growth prior, for the other data sets we show the results obtained with the constant

880 population size prior. Data sets marked with \* have been reduced to 300 randomly picked strains for

881 the Beast analysis.

882

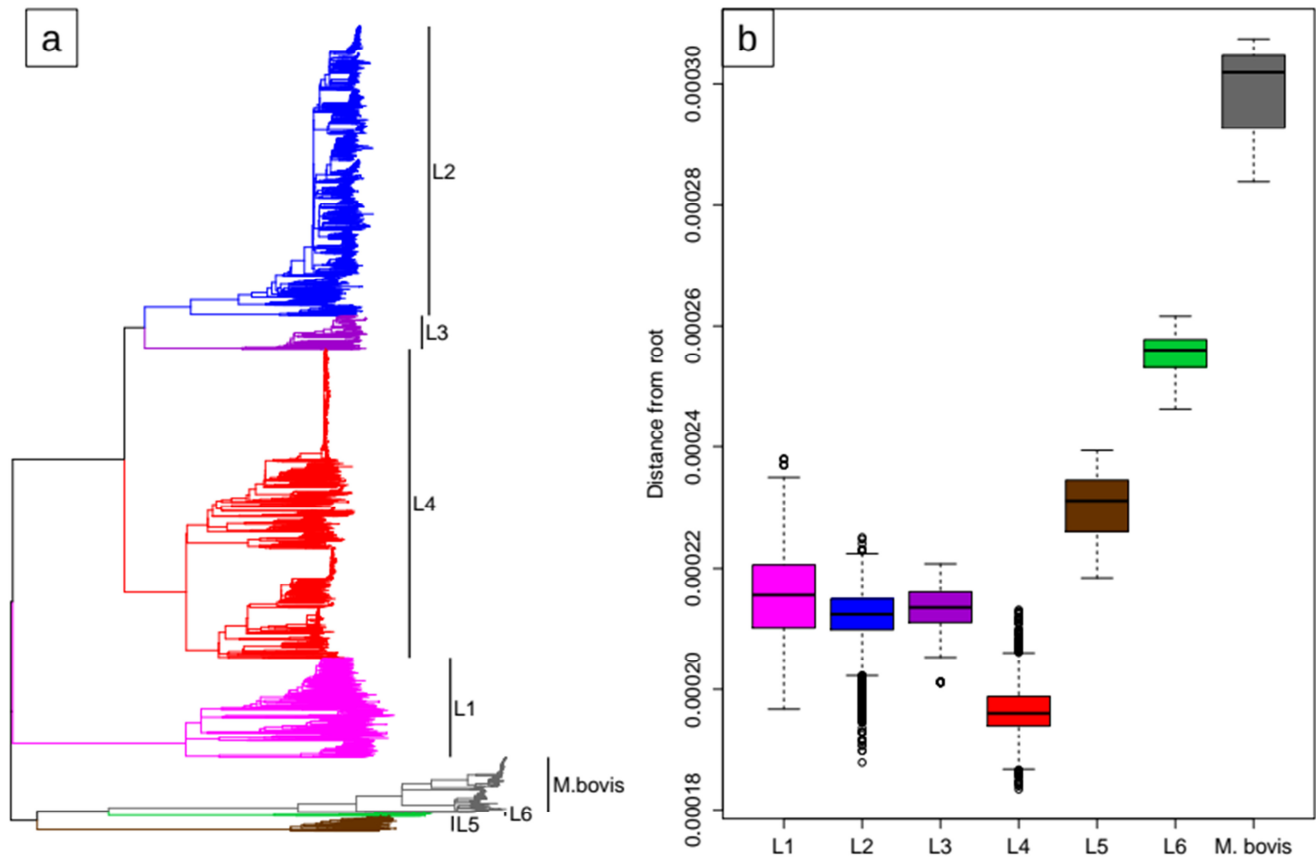

883

884

885 **Figure 3. a)** The Maximum Likelihood tree of the 6,285 strains considered in this study rooted with the  
886 genome sequence of *M. canetti*. **b)** Phylogenetic distance from the root (expected nucleotide changes  
887 per site) of MTB strains by lineage

888

889

890

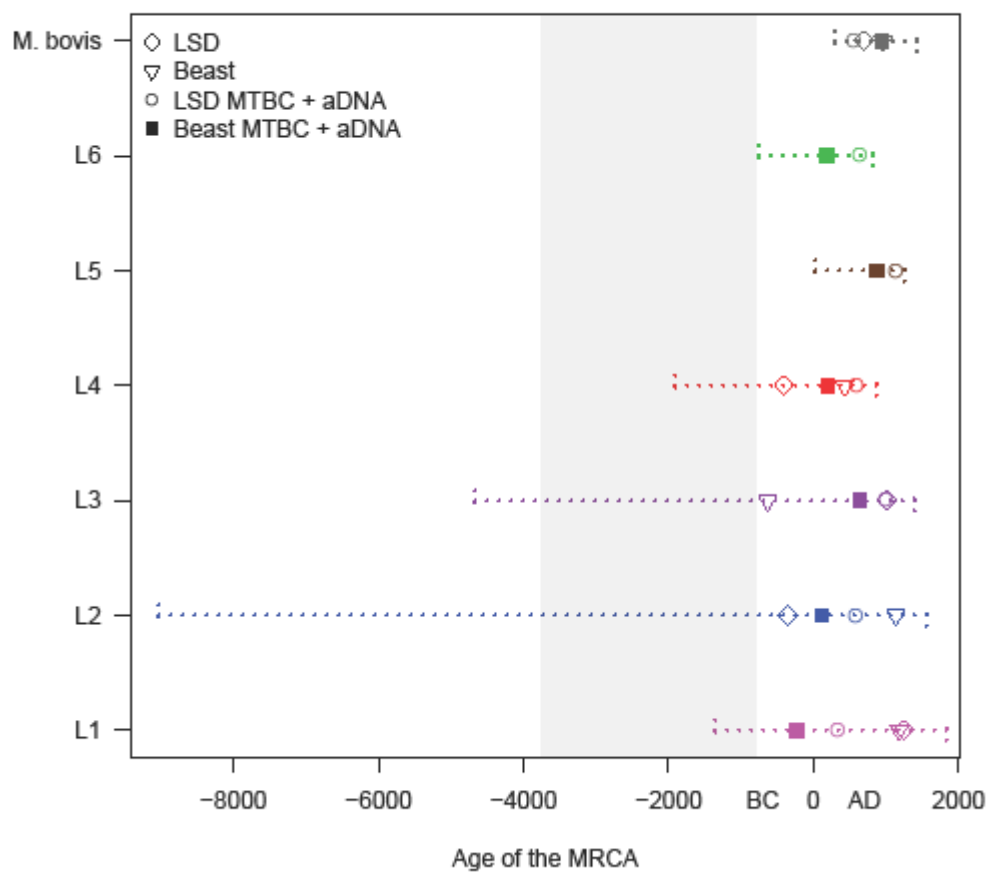

891

892

893

894

895

896

897

898

899



900 **Figure 4.** The inferred age of the MTB lineages.

901 LSD : results of the LSD analysis performed on the individual lineages. Beast: results of the Beast  
902 analysis performed on the individual lineages (median values). LSD MTBC + aDNA: results of the  
903 LSD analysis performed on the complete data set of 6.285 strains + 3 aDNA samples, the age of the  
904 MRCA of the individual lineages was identified on the calibrated tree. Beast MTBC + aDNA: results of  
905 the Beast analysis performed on the random subsample of 500 strains + 3 aDNA samples, the age of the  
906 MRCA of the individual lineages was identified on the calibrated tree (median values). The confidence  
907 intervals were obtained merging the 95% CI and HPD of all analyses. The shaded area represents the  
908 age of the MRCA of the MTB complex obtained with the LSD analyses (with and without aDNA, the  
909 two 95% CI were merged). For L5 and L6 we report only the age inferred on the complete MTB  
910 complex tree, because when analyzed individually these two data sets showed a lack of temporal  
911 structure (they failed the DRT).

912

913

914

915

916

917

918

919

920

## 921 **Supplementary Tables and Figures**

### 922 **Supplementary Table S1**

923 File: Supplementary\_tableS1.tsv

924 List of strains used in this study with sampling year and accession numbers

925

926

927

928

929

930

931

932

933

934

935

936

937

938

939

940

941

942

943

944

945 **Supplementary Figure S2**

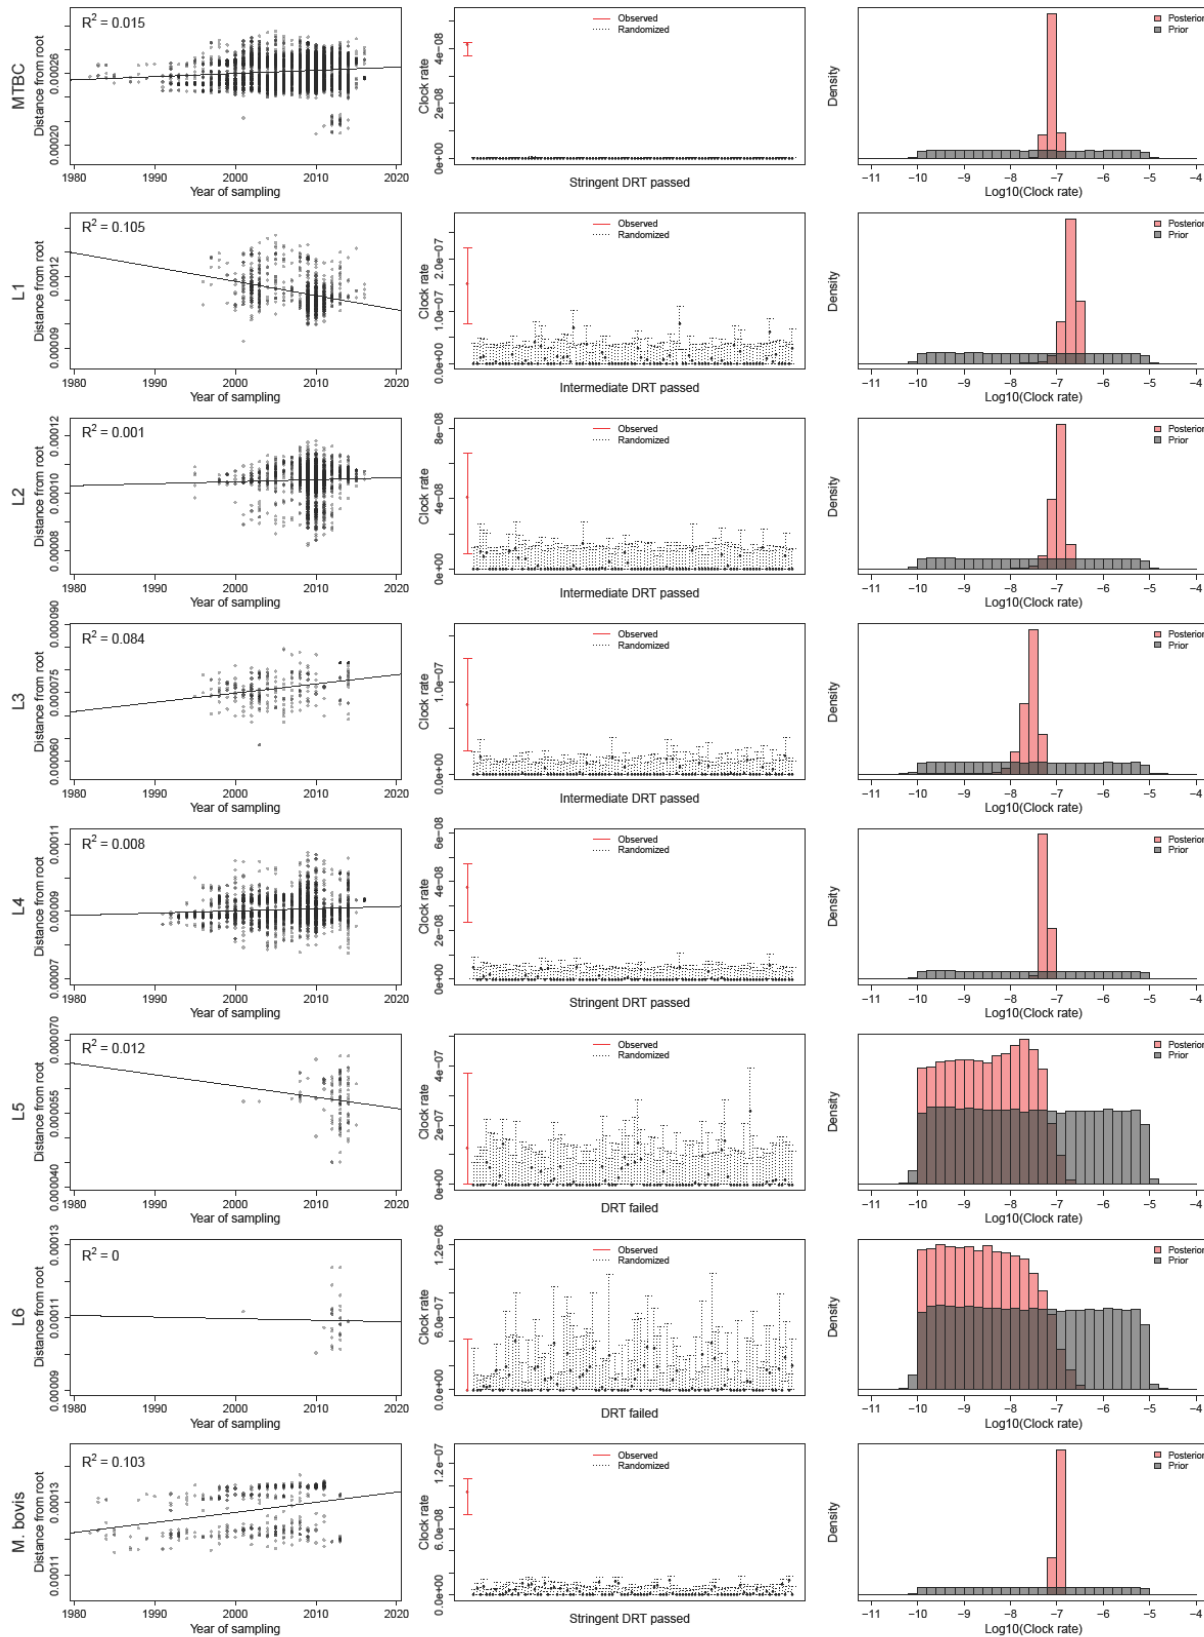

947 **Supplementary Figure S2**

948

949 For each data set we report the results of the root to tip regression, the results of the Date  
950 Randomization Test (DRT) with LSD, and the comparison of the prior and posterior distribution of the  
951 clock rate. The simple DRT is passed when the clock rate estimate for the observed data does not  
952 overlap with the range of estimates obtained from the randomized sets. The intermediate DRT is passed  
953 when the clock rate estimate for the observed data does not overlap with the confidence intervals of the  
954 estimates obtained from the randomized sets. The stringent DRT is passed when the confidence interval  
955 of the clock rate estimate for the observed data does not overlap with the confidence intervals of the  
956 estimates obtained from the randomized sets. Large data sets (MTBC, L1, L2, L4 and *M. bovis*) were  
957 randomly sub-sampled to 300 strains for the Beast analysis.

958

959 **Supplementary Table S3**

960 File: Supplementary\_tableS3.xlsx

961 Results of Beast and LSD for all data sets

962

963

964

965

966

967

968

969

970 **Supplementary Figure S4**

971

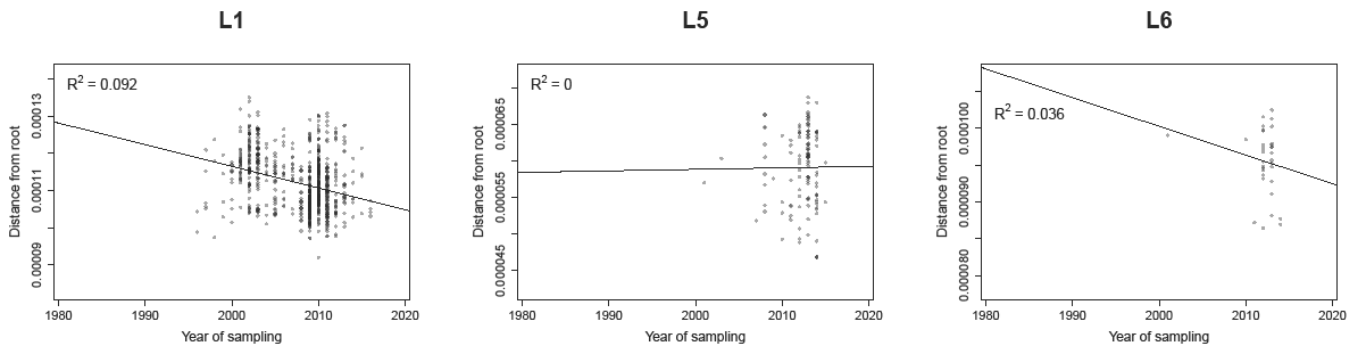

972  
973

974

975 Root to tip regression analysis of L1, L5 and L6. The difference compared to Supplementary Fig. S2 is  
976 that the root was not placed in the position that minimizes the sum of the squared residuals from the  
977 regression line, but was obtained from the complete MTBC tree as shown in Fig. 3a, and it is therefore  
978 defined by the outgroup of each of these lineages.

979

980

981

982

983

984

985

986

987

988

989

990 **Supplementary Figure S5**

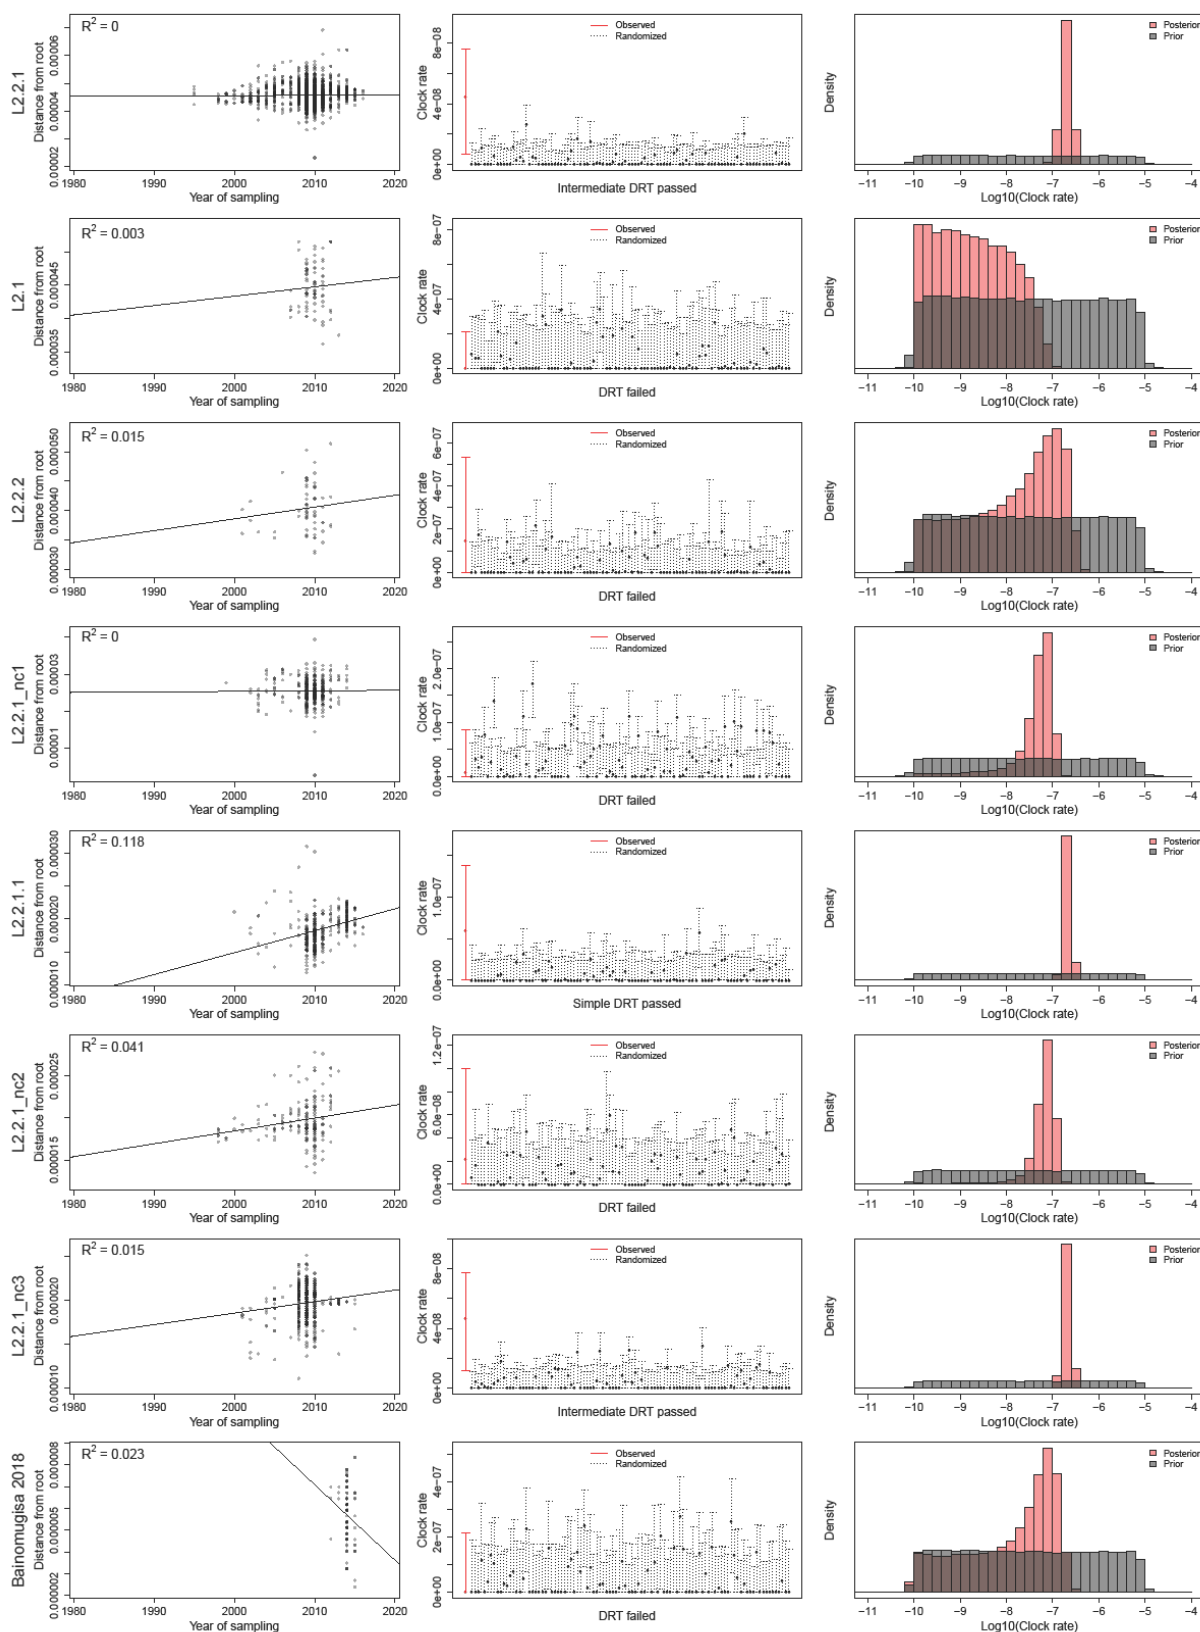

992 **Supplementary Figure S6**

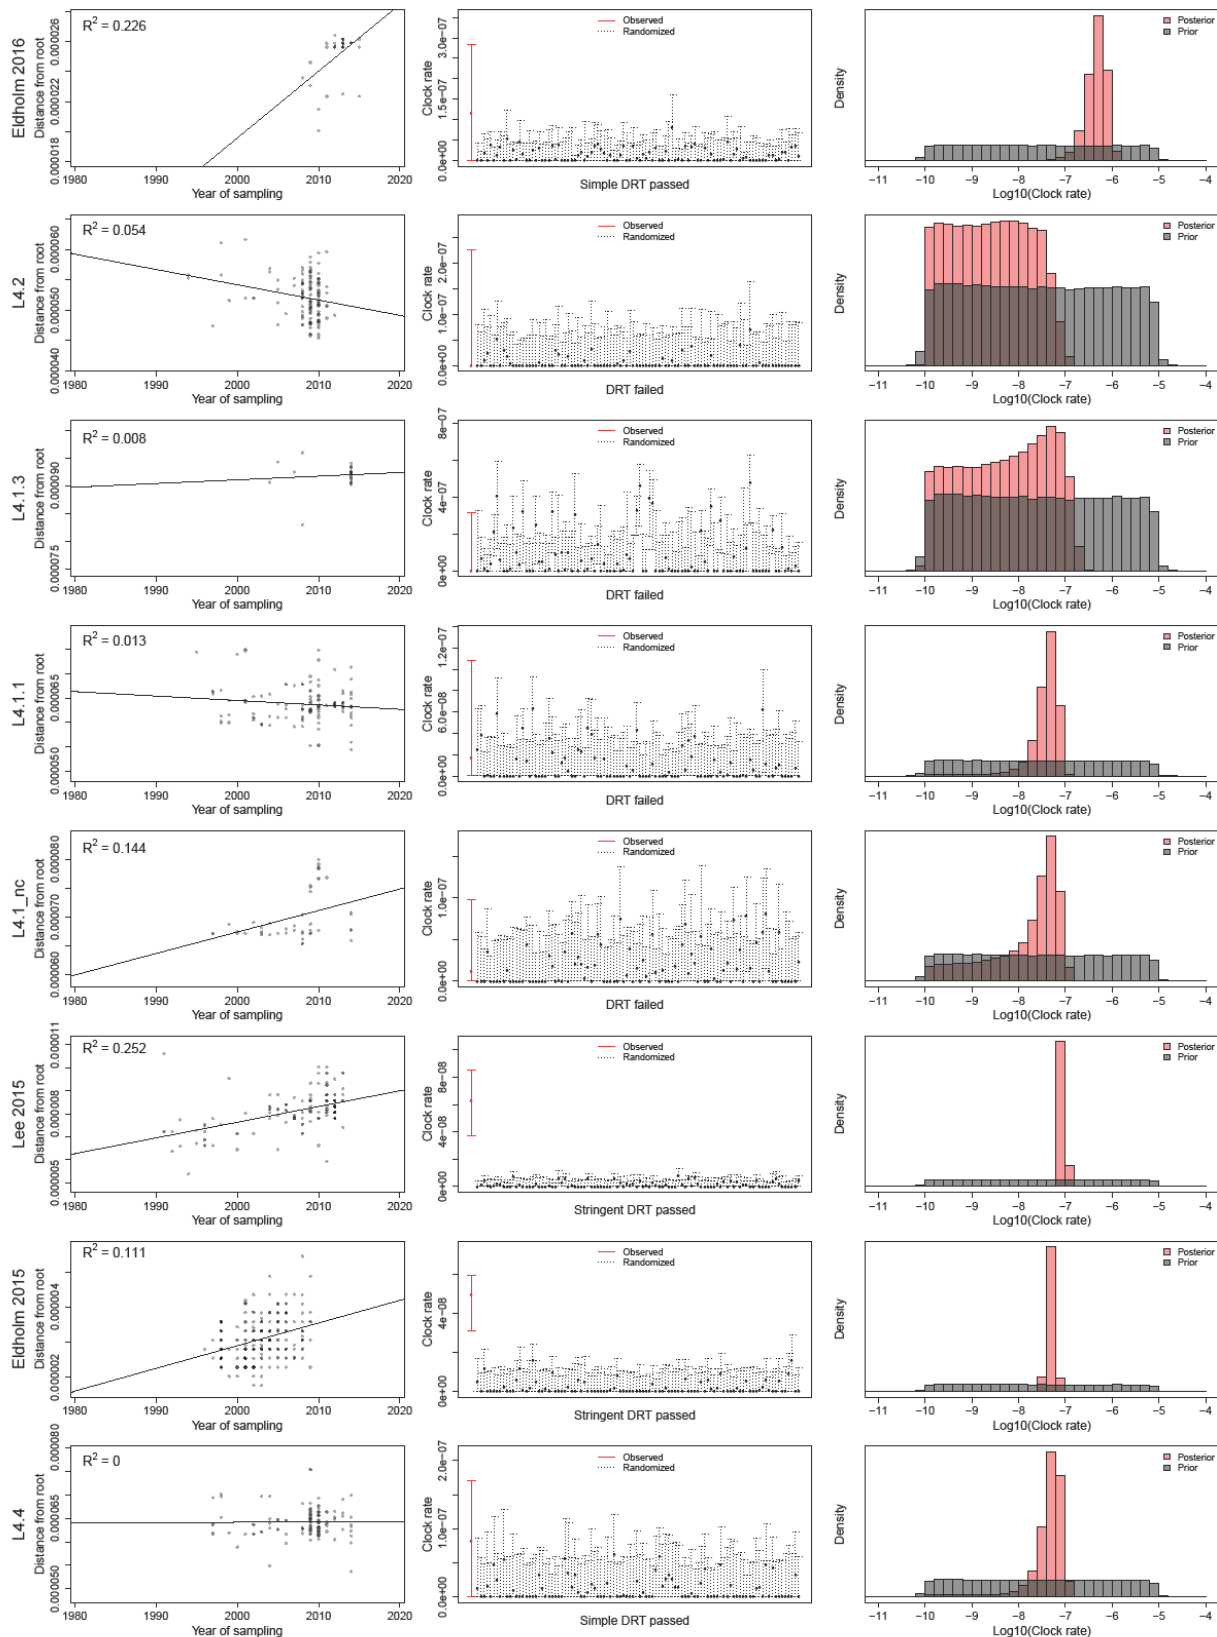

994 **Supplementary Figure S7**

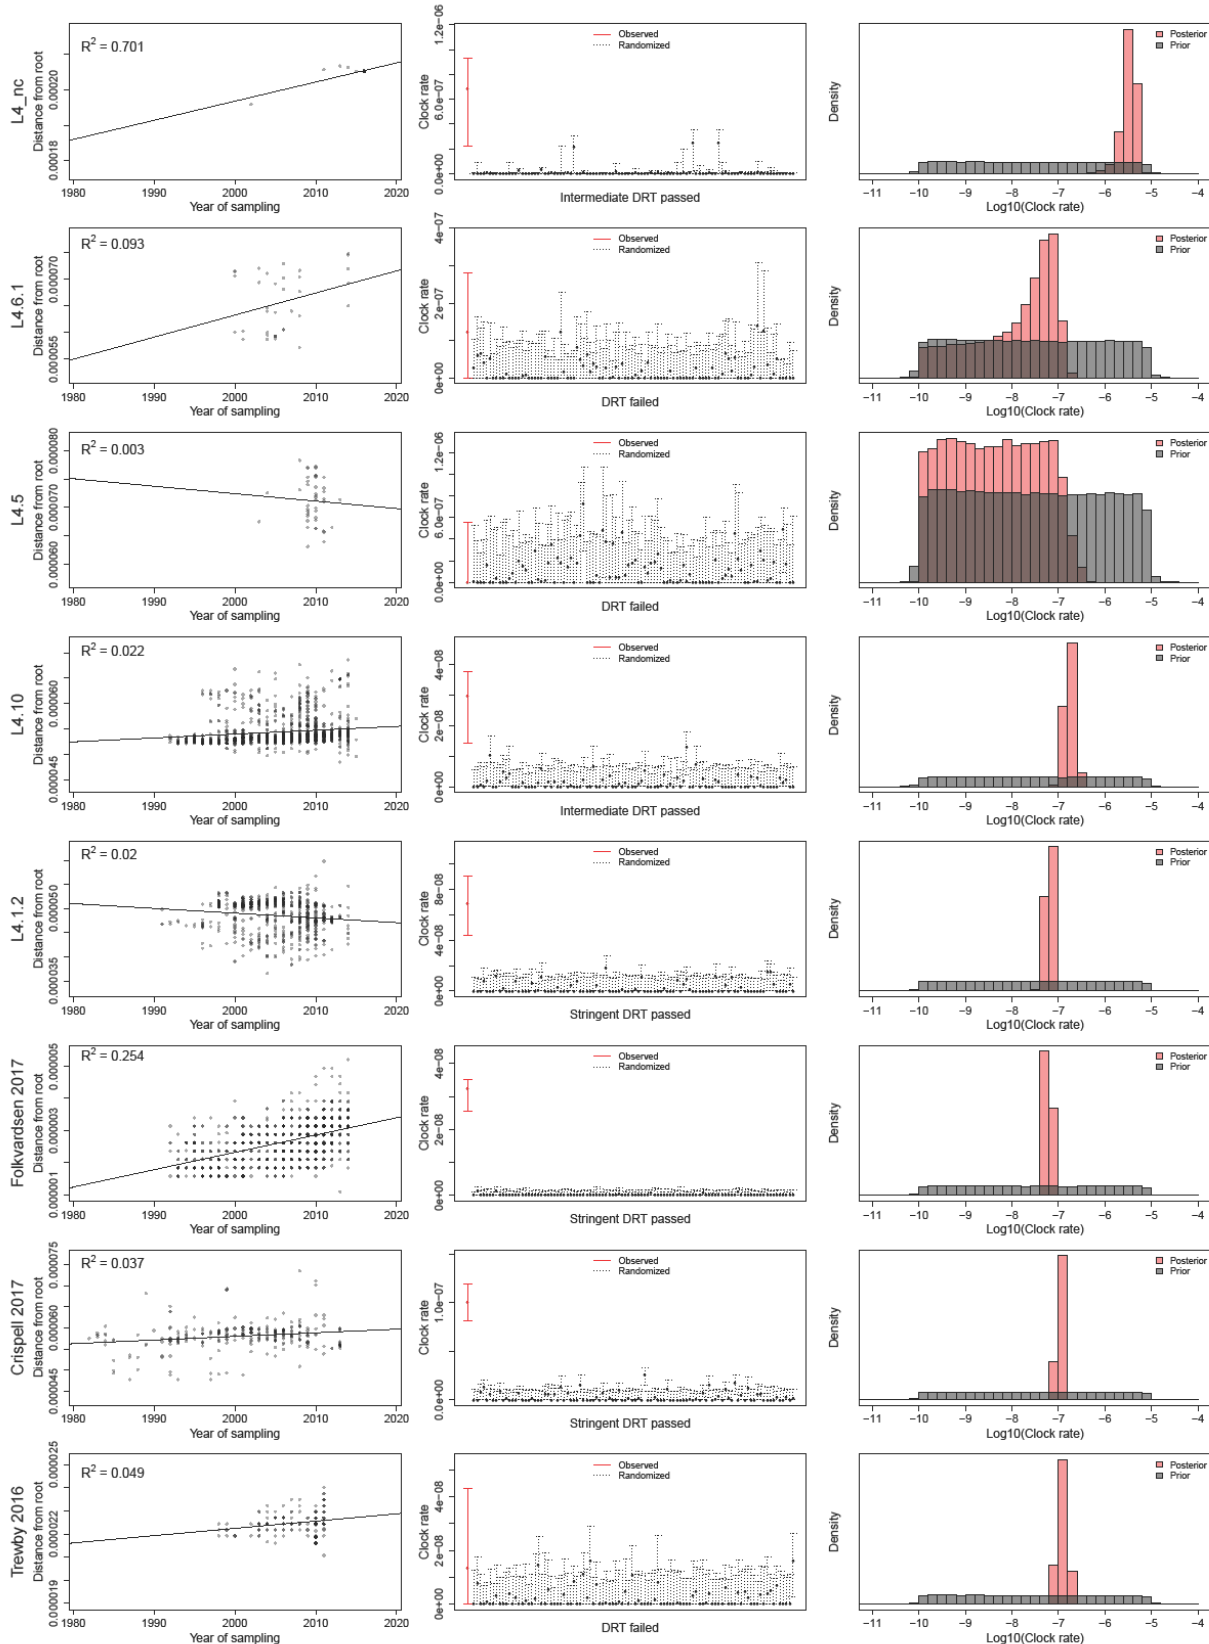



996 **Supplementary Figure S8**

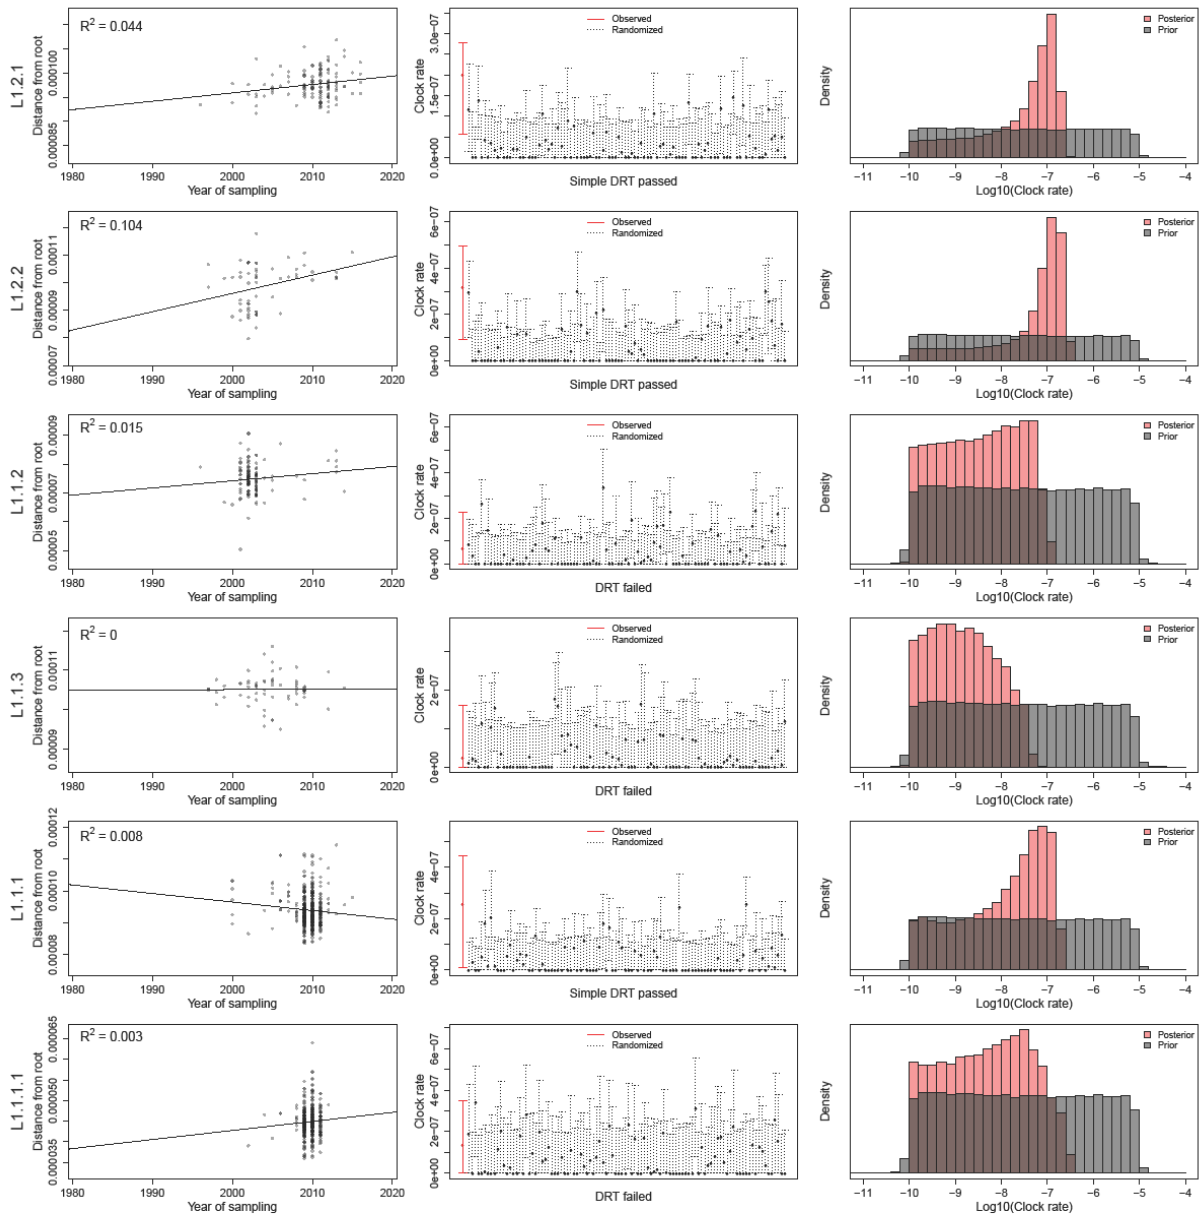

998 **Supplementary Figures S5-S8**

999 For each data set we report the results of the root to tip regression, the results of the Date  
1000 Randomization Test (DRT) with LSD, and the comparison of the prior and posterior distribution of the  
1001 clock rate. The simple DRT is passed when the clock rate estimate for the observed data does not  
1002 overlap with the range of estimates obtained from the randomized sets. The intermediate DRT is passed  
1003 when the clock rate estimate for the observed data does not overlap with the confidence intervals of the  
1004 estimates obtained from the randomized sets. The stringent DRT is passed when the confidence interval  
1005 of the clock rate estimate for the observed data does not overlap with the confidence intervals of the  
1006 estimates obtained from the randomized sets. Large data sets (L1.1.1, L1.1.1.1, L2.2.1, L2.2.1.1,  
1007 L2.2.1\_nc1, L2.2.1\_nc3, L4.10, L4.1.2) were randomly sub-sampled to 300 strains for the Beast  
1008 analysis.

1009

1010

1011

1012

1013

1014

1015

1016

1017

1018

1019 **Supplementary Figure S9**

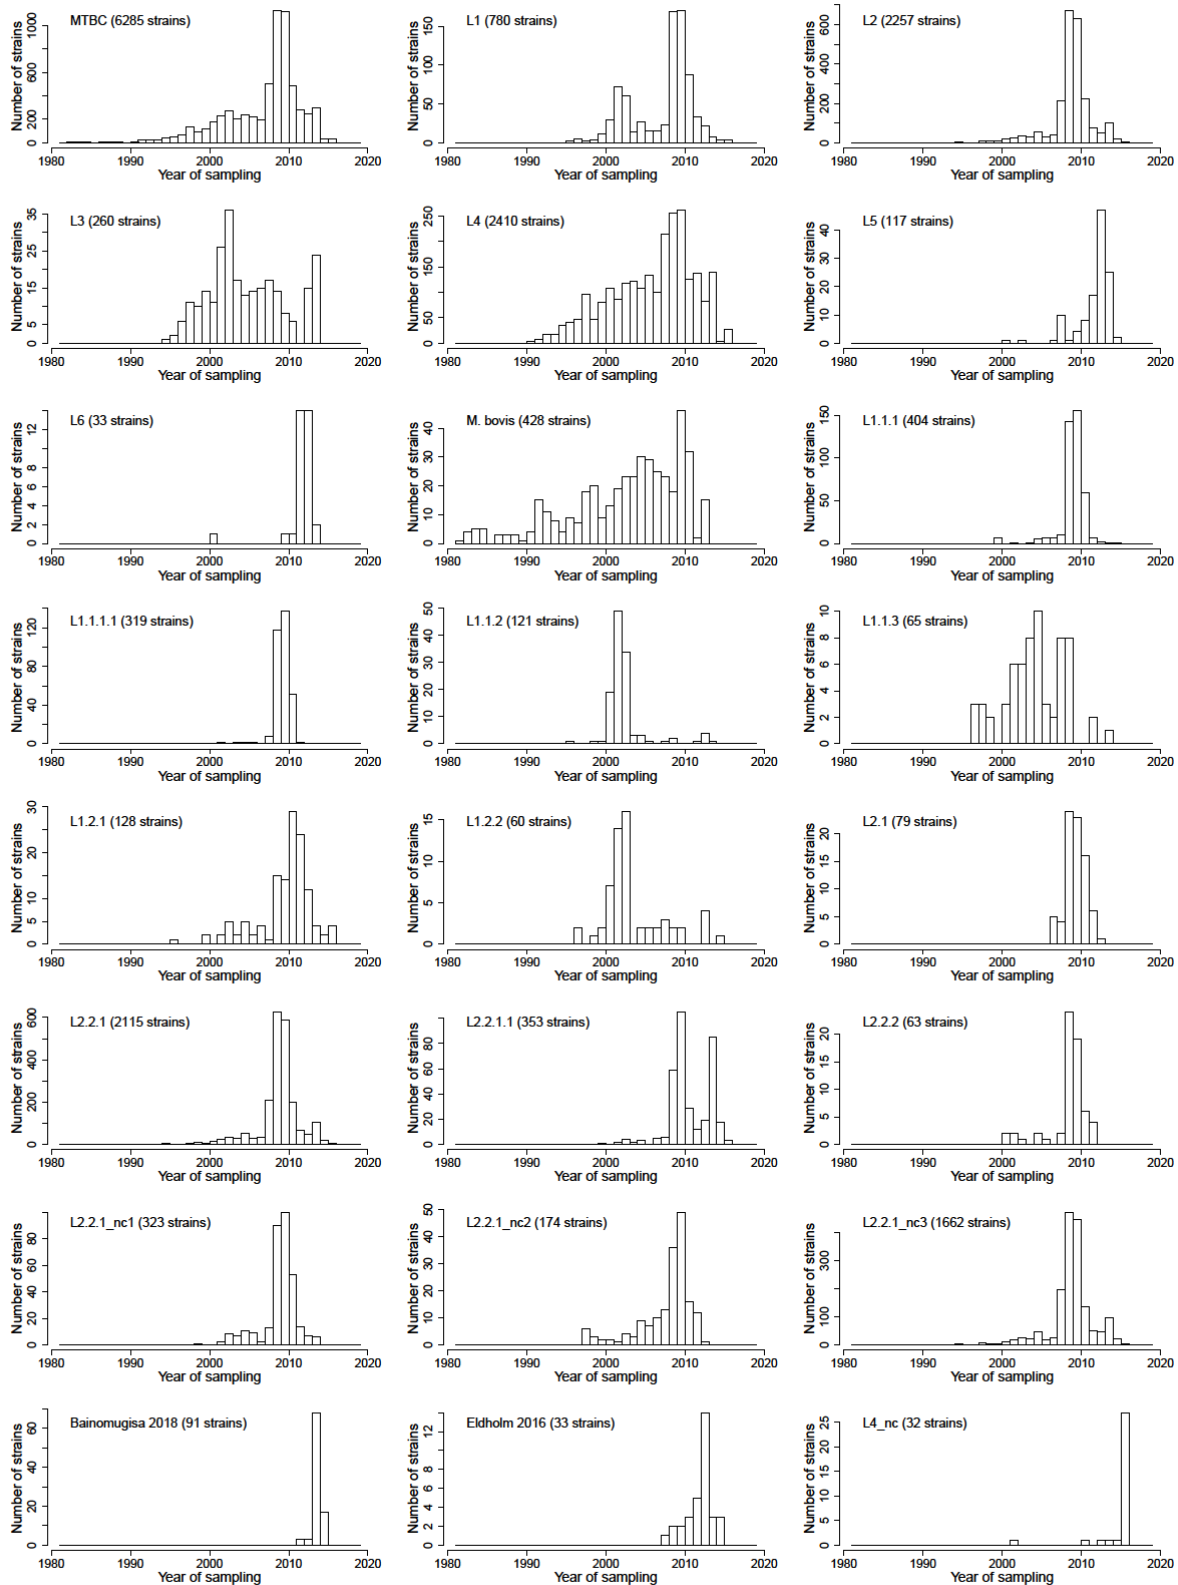

1020

1021 **Supplementary Figure S10**

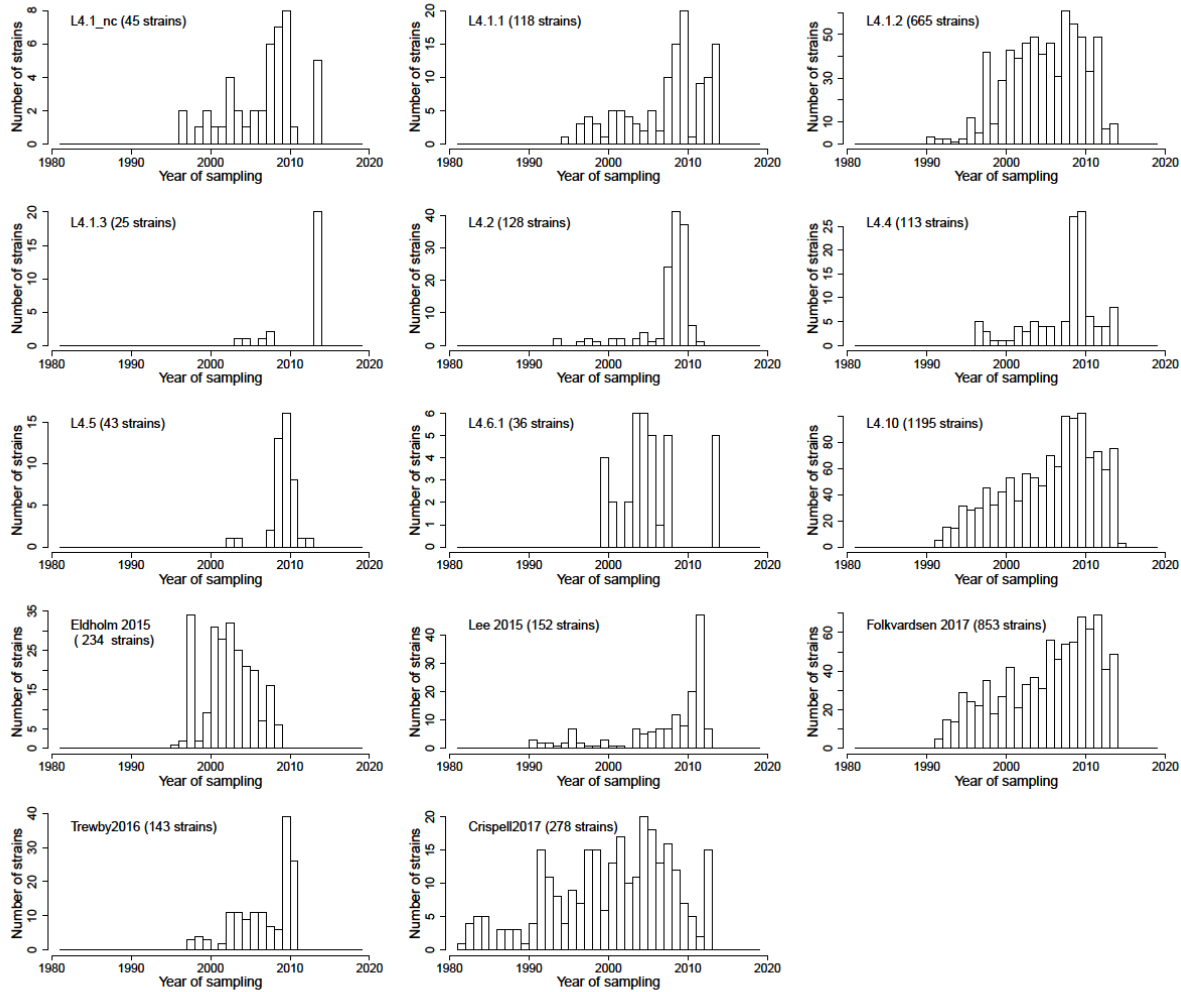

1022

1023 **Supplementary Figures S9 - S10**

1024 Distribution of the sampling years for all data sets

1025

1026

1027

1028

1029 **Supplementary Figure S11**

1030

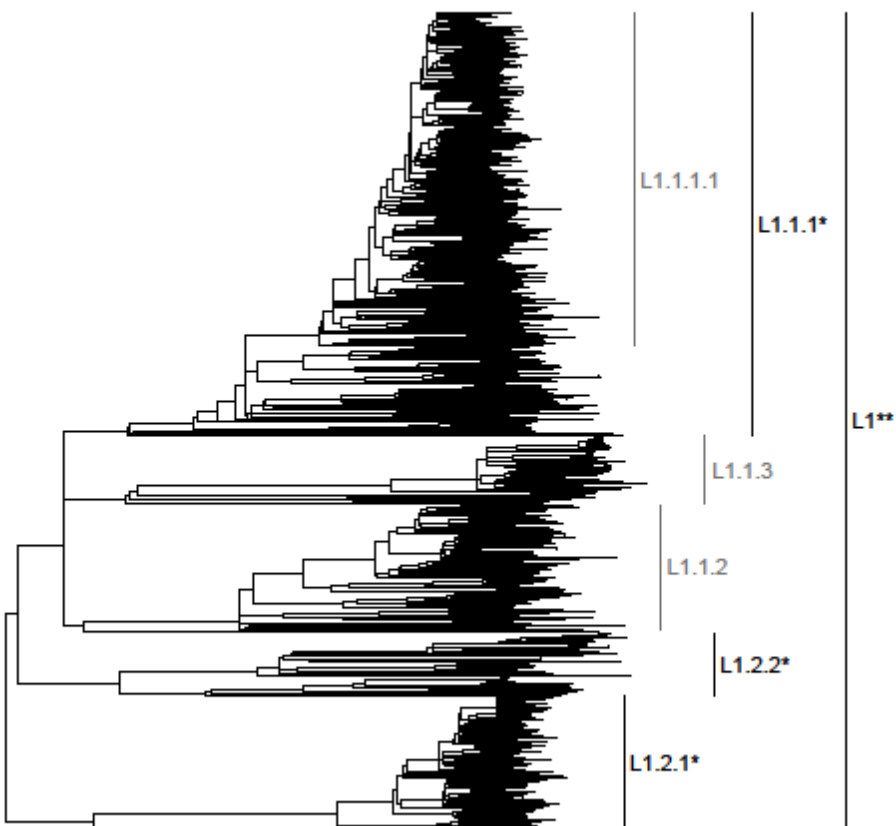

1031

1032 Sub-lineages of L1 that were included in the analysis. Clades colored in gray did not pass the DRT,

1033 clades colored in black passed the DRT. \*: simple DRT passed, \*\* intermediate DRT passed, \*\*\*:

1034 stringent DRT passed.

1035

1036

1037

1038

1039 **Supplementary Figure S12**

1040

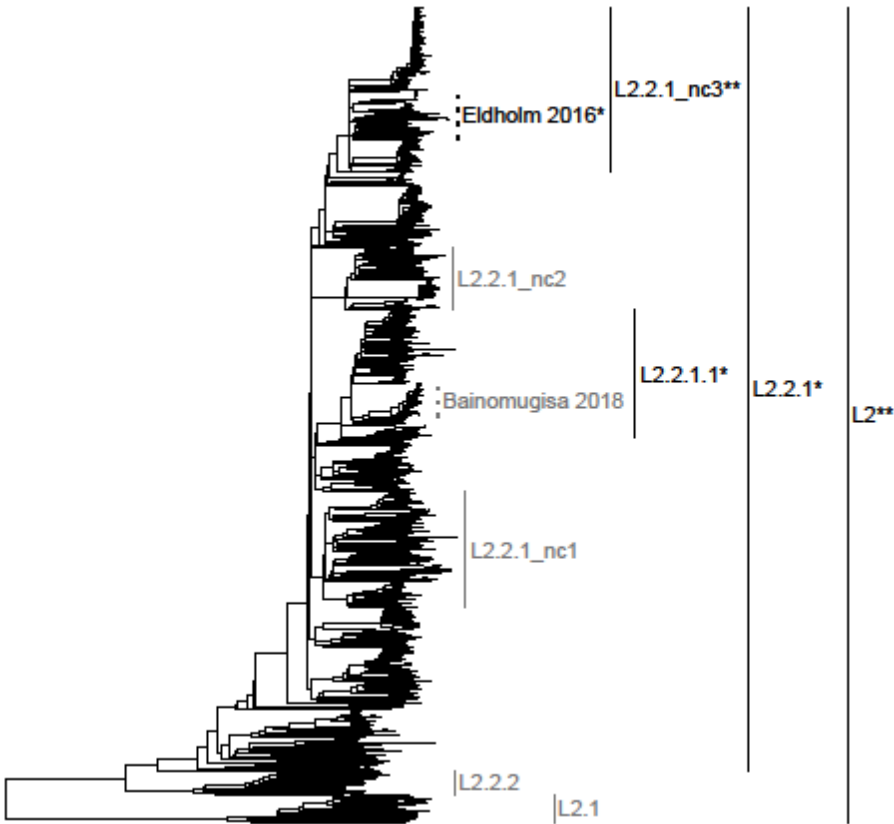

1041

1042 Sub-lineages and outbreaks of L2 that were included in the analysis. Clades colored in gray did not

1043 pass the DRT, clades colored in black passed the DRT. \*: simple DRT passed, \*\* intermediate DRT

1044 passed, \*\*\*: stringent DRT passed. Dotted lines represent local two outbreaks from previous studies.

1045

1046

1047

1048

1049 **Supplementary Figure S13**

1050

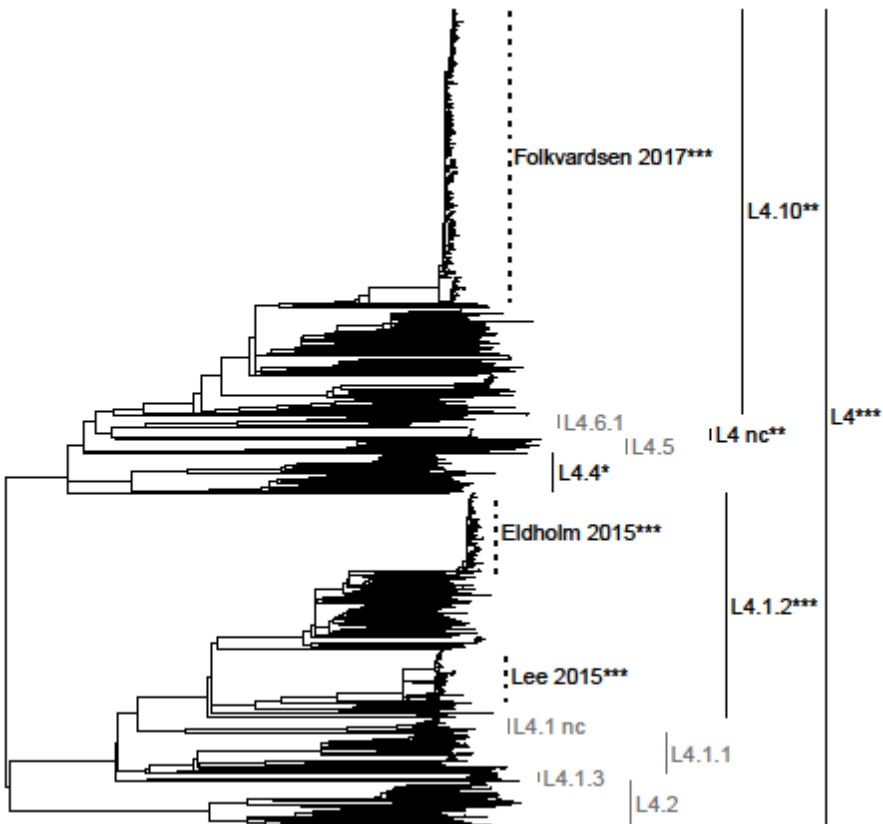

1051

1052 Sub-lineages and outbreaks of L4 that were included in the analysis. Clades colored in gray did not

1053 pass the DRT, clades colored in black passed the DRT. \*: simple DRT passed, \*\* intermediate DRT

1054 passed, \*\*\*: stringent DRT passed. Dotted lines represent three outbreaks from previous studies.

1055

1056

1057

1058

1059 **Supplementary Figure S14**

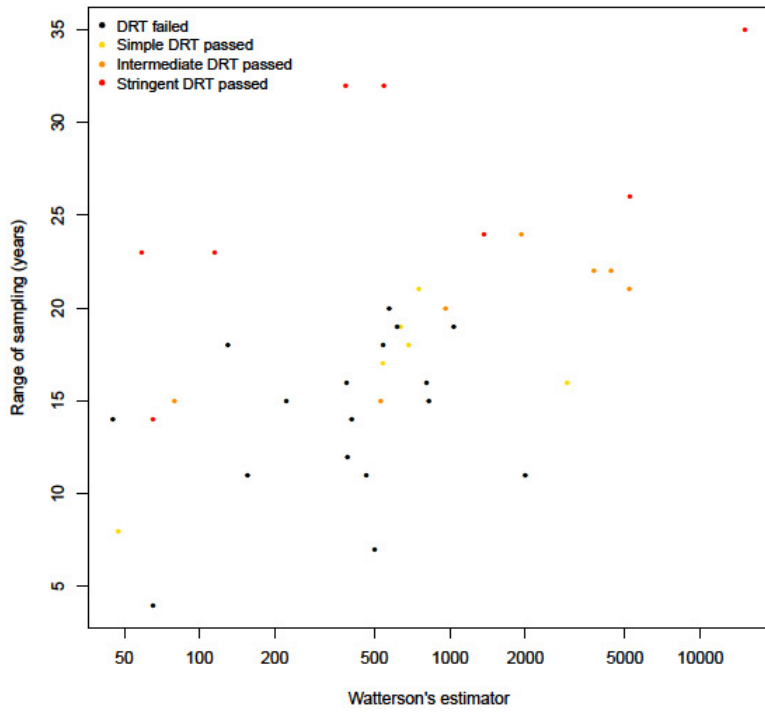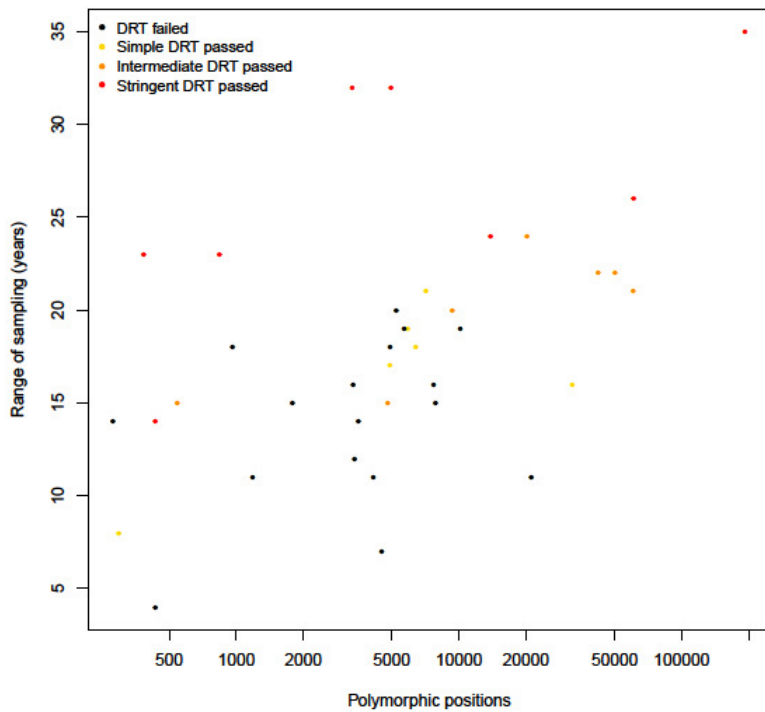

1060



1061 **Supplementary Figure S14**

1062 Results of the DRT for all data sets ordered by genetic diversity (Watterson's estimator and number of  
1063 polymorphic positions) and temporal range. Data sets with fewer strains sampled in a shorter period of  
1064 time tended to fail the DRT irrespectively of the genetic diversity of the data set.

1065

1066 **Supplementary Figure S15**

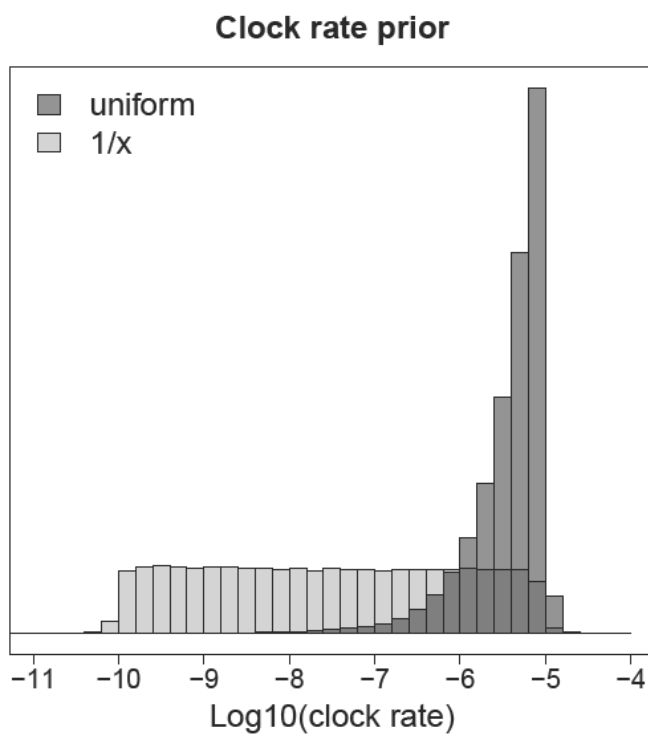

1067

1068

1069 Comparison of different priors on the clock rate (1/x prior and uniform prior). The uniform prior place  
1070 most weight on high clock rates, while the 1/x prior distributes the weight through all order of  
1071 magnitude.

1072

1073

1074 **Supplementary Figure S16**

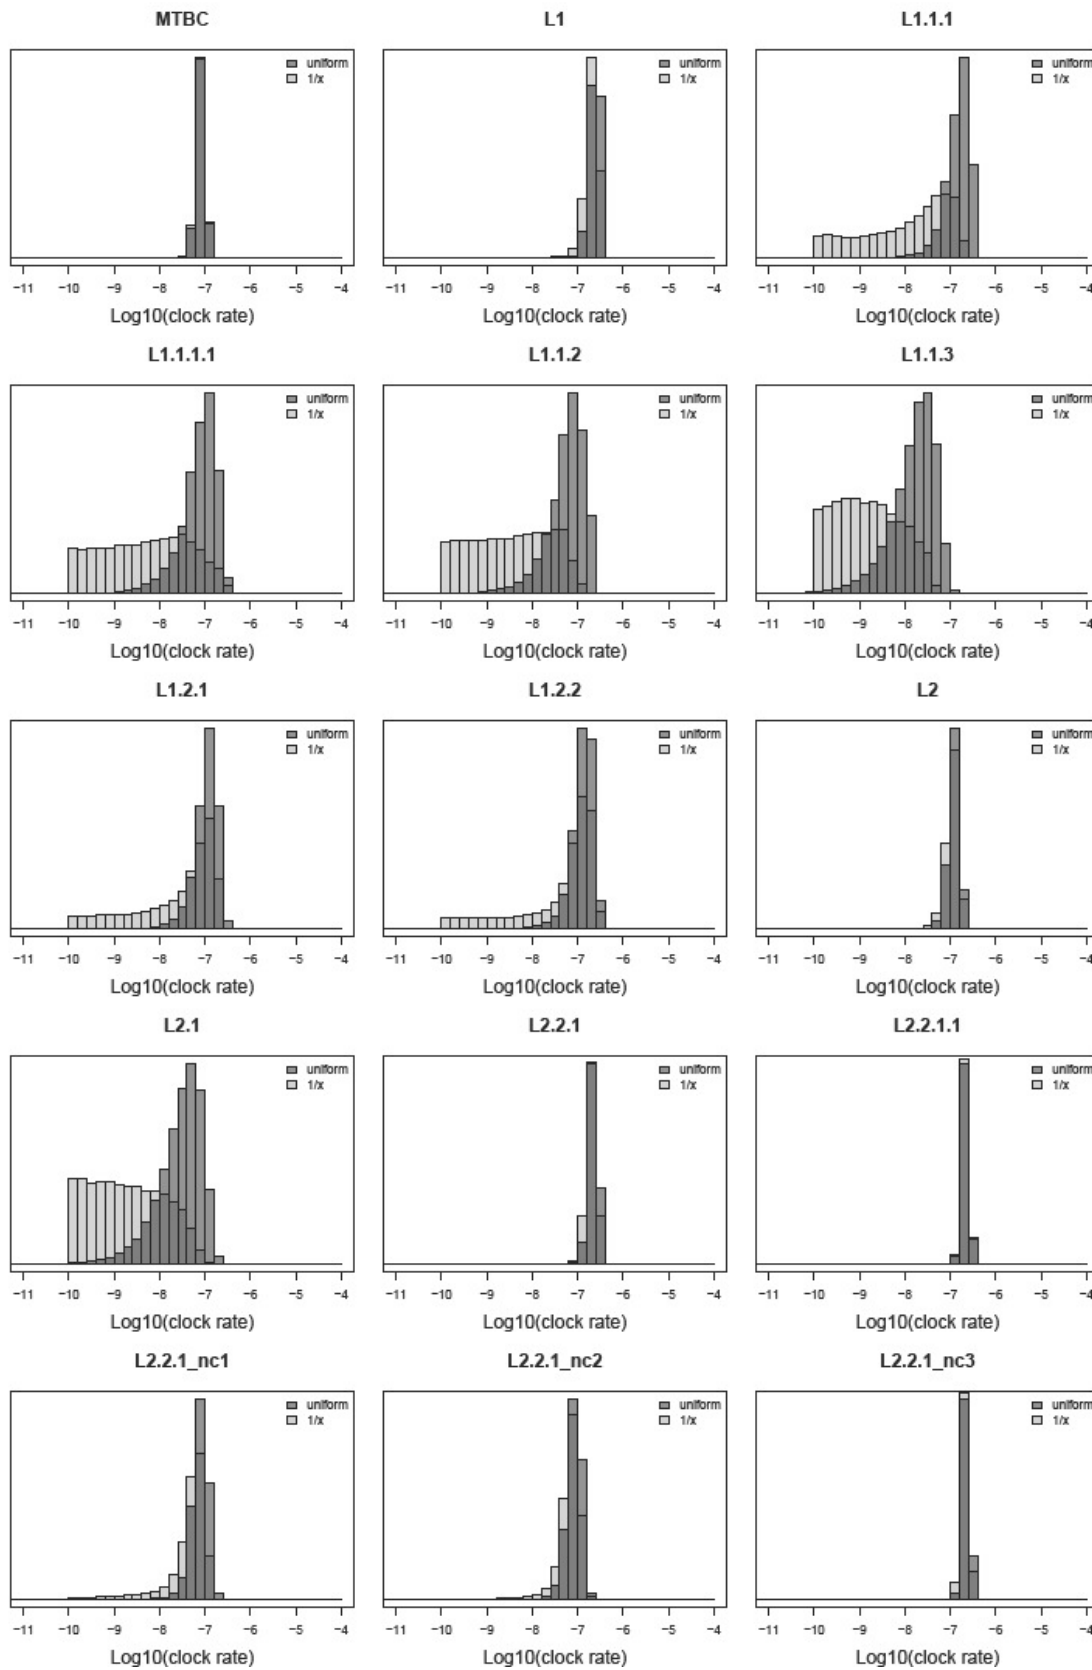

1075

1076 **Supplementary Figure S17**

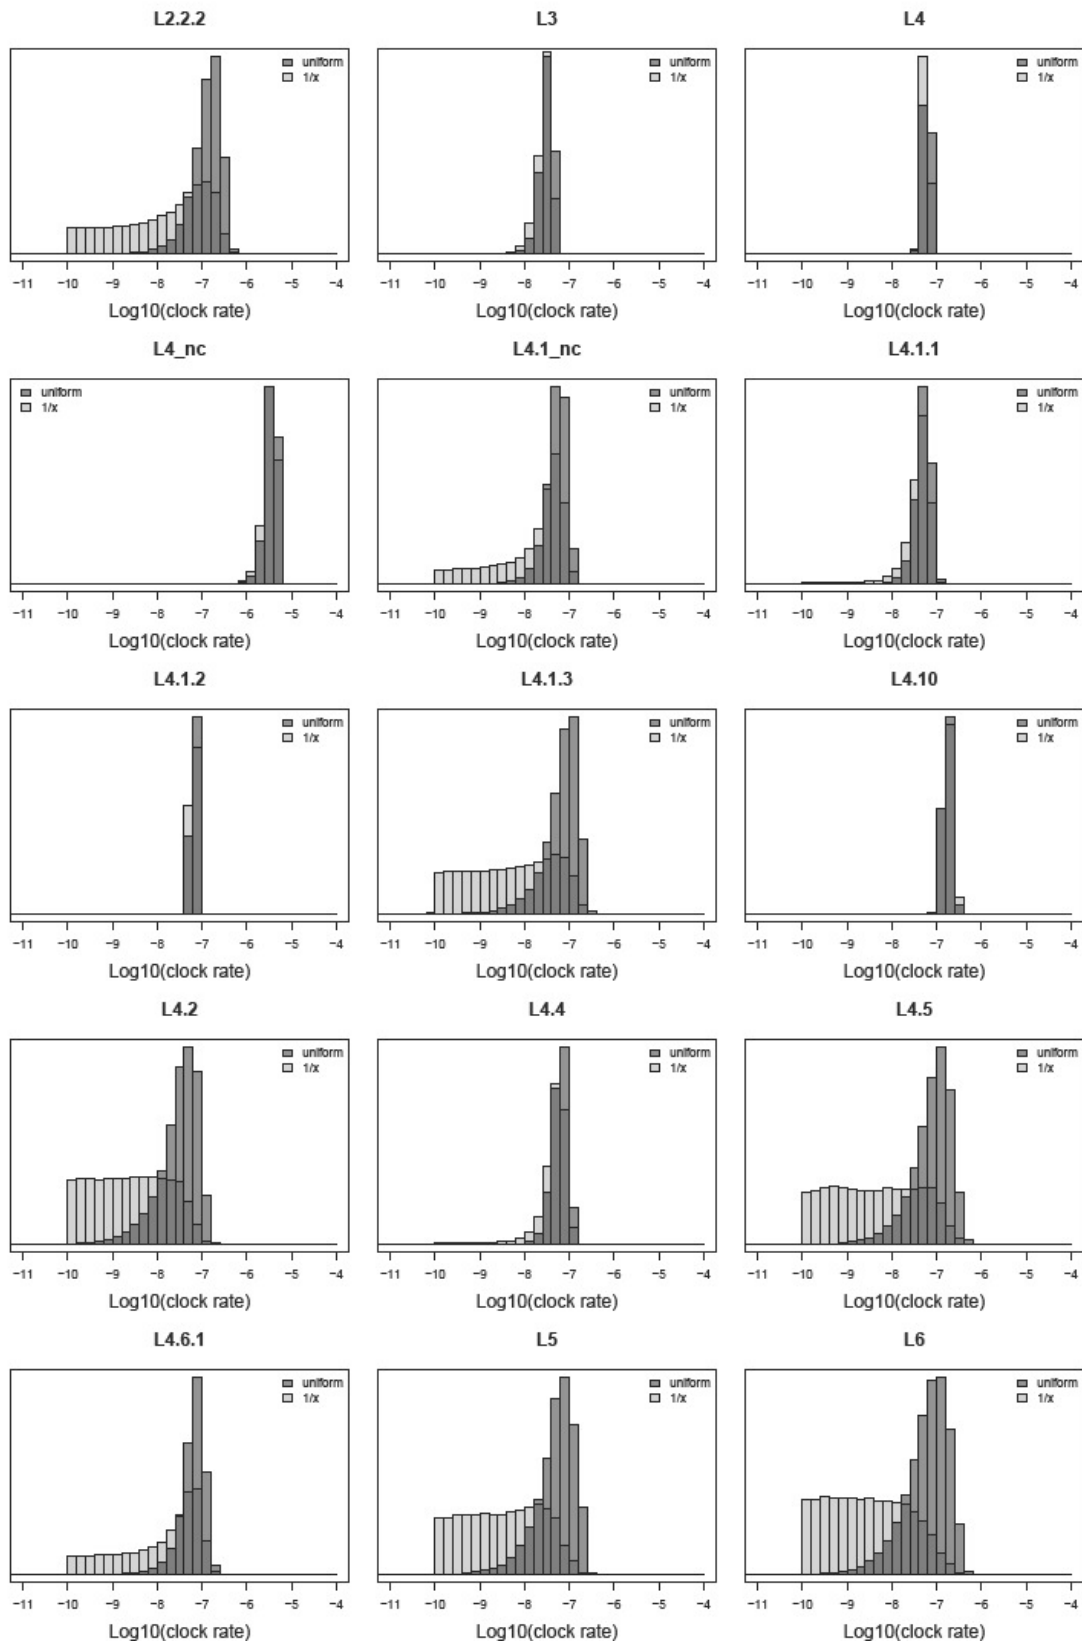

1077

1078 **Supplementary Figure S18**

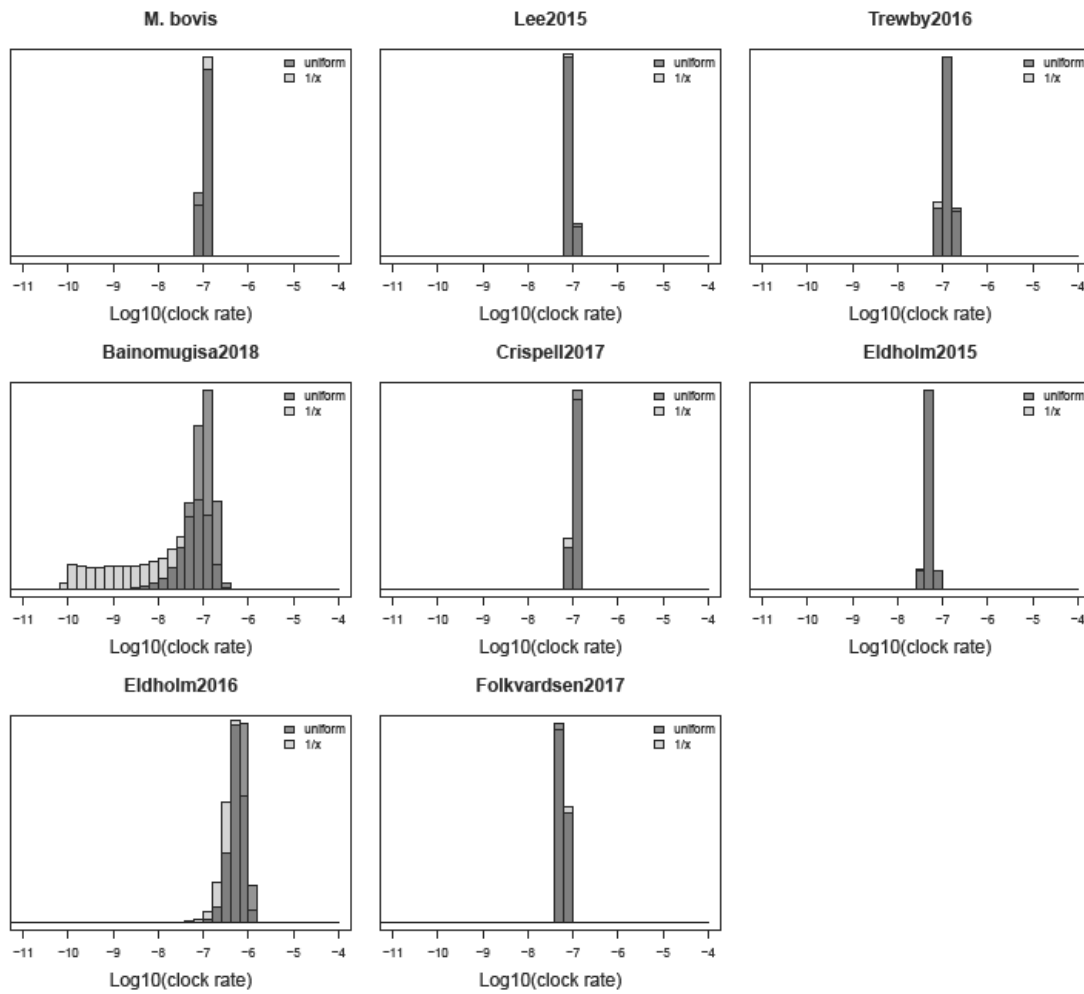

1079

1080

1081 **Supplementary Figures S16-S18**

1082 Posterior distribution of the clock rate, obtained with two different priors (1/x and uniform

1083 [ $10^{-10} - 10^{-5}$ ]). The prior distributions for the two analyses are shown in Sup. Fig. S15.

1084

1085

1086

1087 **Supplementary Figure S19**

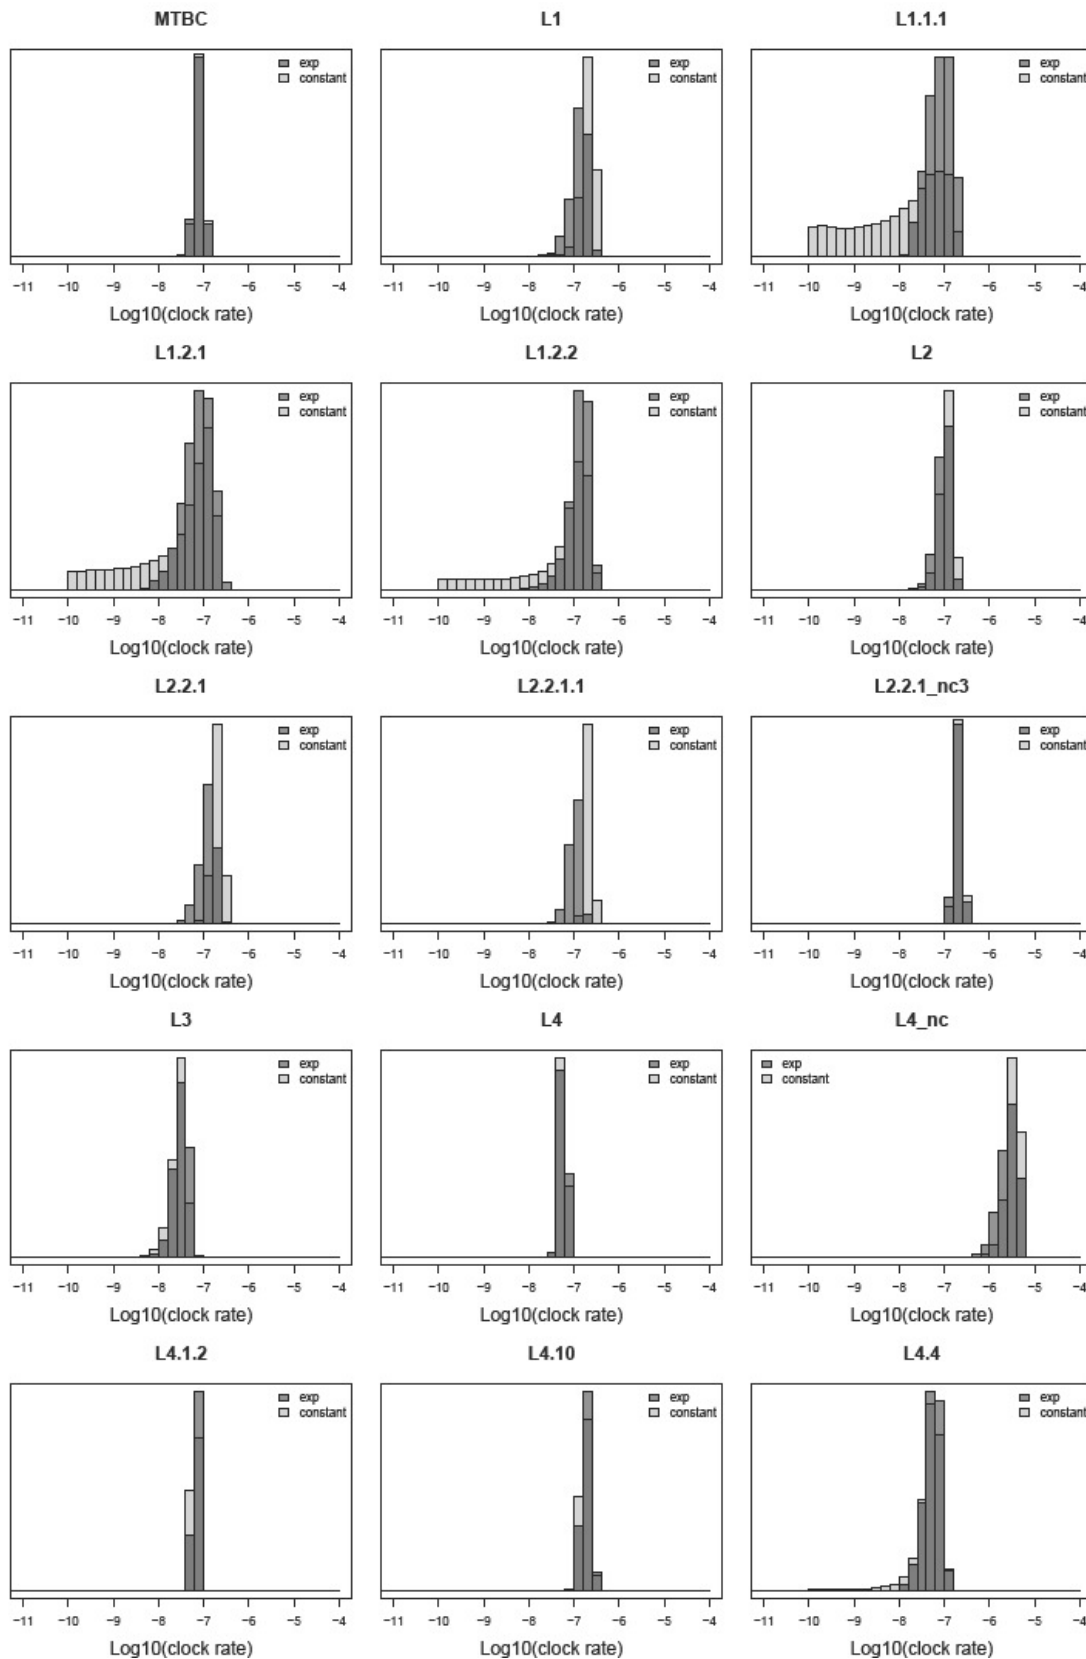

1088

1089 **Supplementary Figure S20**

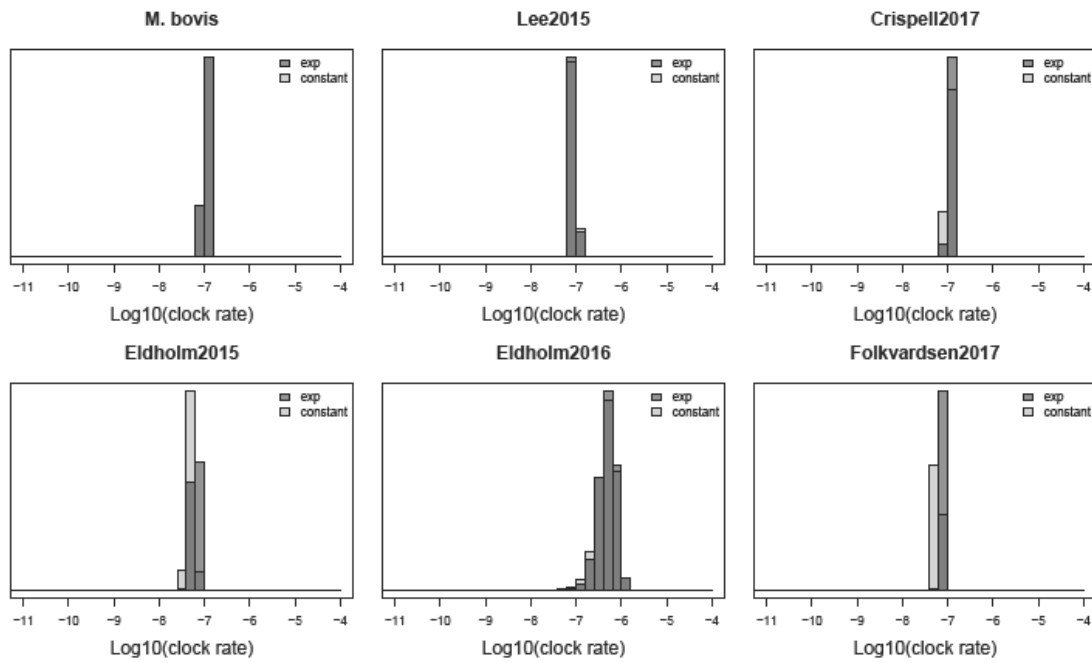

1090

1091 **Supplementary Figures S19-S20**

1092 Comparison of the posterior distribution of the clock rate obtained with a constant population size and  
1093 an exponential population growth prior.

1094

1095

1096

1097

1098

1099

1100

1101

1102 **Supplementary Figure S21**

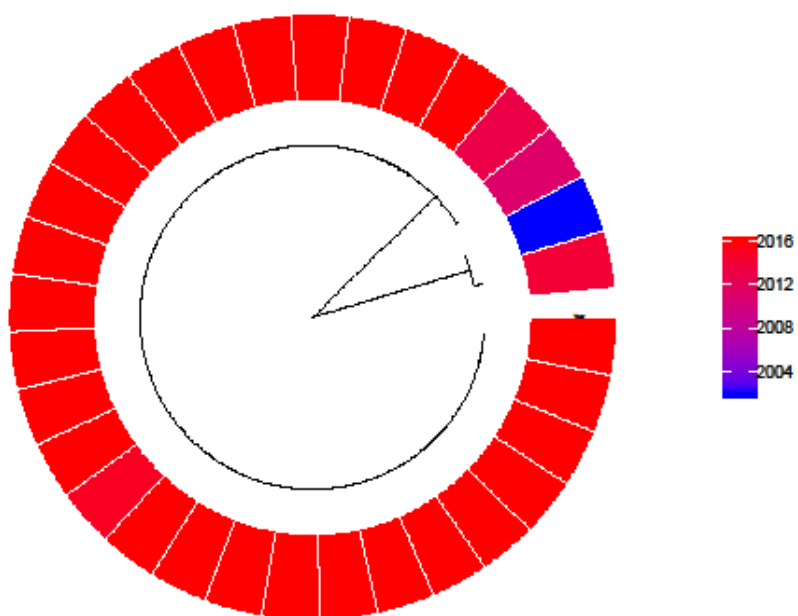

1103

1104 Phylogenetic tree of data set L4\_nc with tips colored according to the year of sampling

1105

1106

1107

1108

1109

1110

1111

1112

1113

1114

1115 **Supplementary Figure S22**

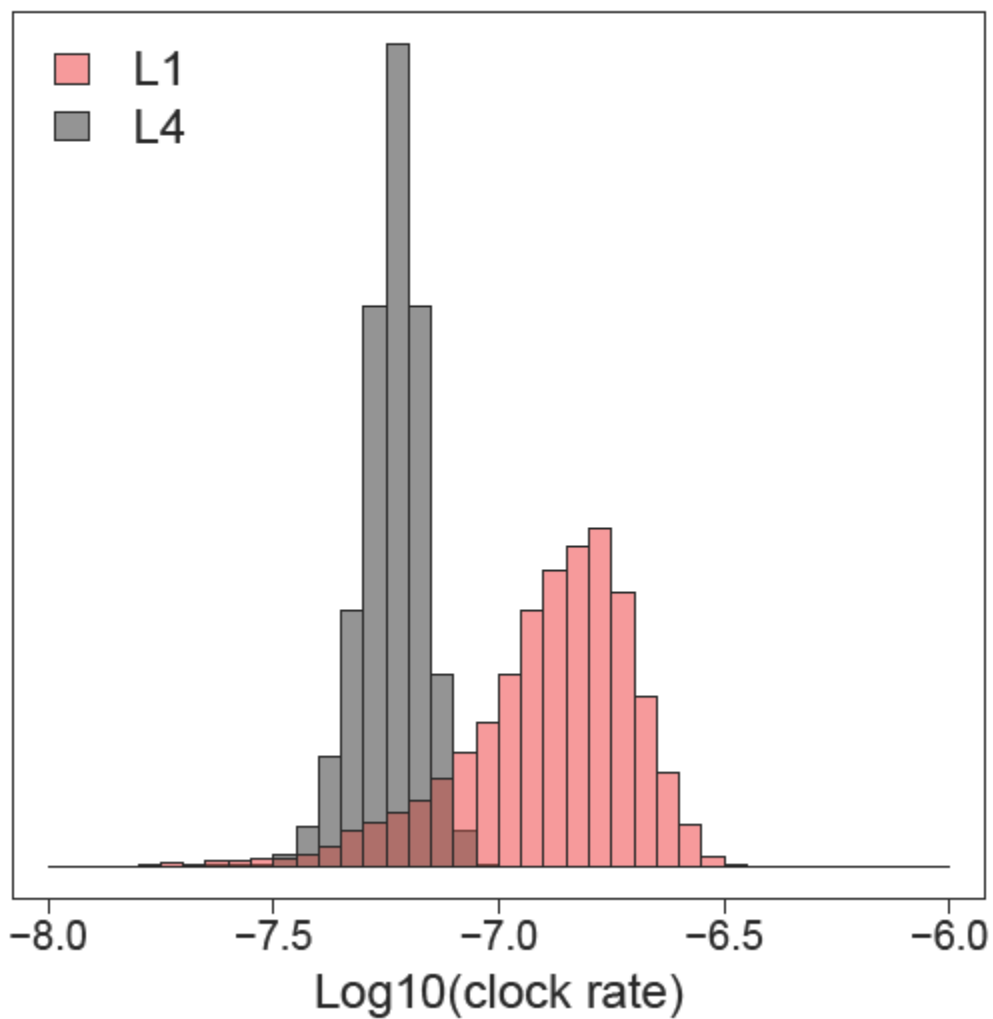

1116

1117 Posterior distribution of the clock rate for L1 and L4. These are the results of the analysis with the 1/x  
1118 prior on the clock rate and the exponential population growth (or shrinkage) prior.

1119

1120

1121

1122

1123

1124



1125 **Supplementary Table S23**

1126 The age of the MTB complex and of its lineages resulted from different analyses

| Lineage         | LSD <sup>1</sup>        | Beast <sup>2</sup>   | LSD + aDNA <sup>3</sup> | Beast + aDNA <sup>4</sup> |
|-----------------|-------------------------|----------------------|-------------------------|---------------------------|
| MTBC            | -2287<br>[-3742, -1849] | NA                   | -1449<br>[-2414, -812]  | NA                        |
| L1              | 1245<br>[510, 1470]     | 1178<br>[-113, 1827] | 327                     | -230<br>[-1354, 489]      |
| L2              | -358<br>[-9035, 587]    | 1133<br>[179, 1559]  | 575                     | 114<br>[-809, 732]        |
| L3              | 1006<br>[-949, 1385]    | -632<br>[-4665, 683] | 983                     | 638<br>[-55, 1111]        |
| L4              | -410<br>[-1906, 91]     | 428<br>[-192, 860]   | 582                     | 200<br>[-676, 779]        |
| L5              | NA                      | NA                   | 1131                    | 877<br>[29, 1250]         |
| L6              | NA                      | NA                   | 633                     | 181<br>[-766, 809]        |
| <i>M. bovis</i> | 692<br>[297, 849]       | 959<br>[344, 1431]   | 551                     | 936<br>[374, 1286]        |

1127

1128 <sup>1</sup> Age of the most recent common ancestor (negative values = BC, positive values = AD), point estimate  
1129 and 95% CI. These estimates refer to the individual analyses performed on each data set.

1130 <sup>2</sup> Age of the most recent common ancestor (negative values = BC, positive values = AD), median value  
1131 and 95% HPD. These estimates refer to the individual analyses performed on each data set. Since Beast  
1132 placed the root in the “wrong” position we have no estimates for the MTB complex. The results for L3  
1133 refer to the analysis with constant population size, all other data sets rejected the constant population  
1134 size model, therefore we report the results of the exponential population growth analysis.

1135 <sup>3</sup> Age of the most recent common ancestor (negative values = BC, positive values = AD), point estimate  
1136 and 95% CI. These estimates refer to a single analysis performed on the complete data set of 6,285  
1137 strains + 3 aDNA samples; LSD outputs confidence intervals only for the MRCA of the tree and not for  
1138 the nodes.

1139 <sup>4</sup> Age of the most recent common ancestor (negative values = BC, positive values = AD), median value  
1140 and 95% HPD. These estimates refer to a single analysis performed on the random subset of MTBC  
1141 composed of 500 strains + 3 aDNA samples; since Beast placed the root in the “wrong” position we  
1142 have no estimates for the MTB complex. Nevertheless we could retrieve the age of the MRCA of the  
1143 individual lineages.

1144

1145 **Supplementary Table S24**

1146 File: Supplementary\_tableS24.tsv

1147 List of all accession numbers, before filtering

1148

1149

1150

1151

1152

1153

1154

1155

1156

1157

1158

1159

1160

1161

1162

1163
